# Supplementary material for: Effect of PHRs and PCPs on Microalgal Growth, Metabolism and Microalgae-Based Bioremediation Processes: A Review
Source: PubMed Central journal article supplement (PMC6567089; doi:10.3390/ijms20102492), 2019-05-20
Supplement: ijms-20-02492-s001.pdf [file ijms-20-02492-s001.pdf]

Effect of PHRs and PCPs on Microalgal Growth, Metabolism and Microalgae-Based Bioremediation Processes: a Review

**Table S1.** Examples for the occurrence of PHRs and PCPs in different types of wastewaters.

| Wastewater type       | PHRs or PCPs         | Class                                            | Exemplary concentrations<br>[µg/L] | Ref. |
|-----------------------|----------------------|--------------------------------------------------|------------------------------------|------|
| Hospital wastewaters  | Ampicillin           | β-lactams                                        | 53                                 | [22] |
|                       | Vancomycin           | Glycopeptides                                    | 14                                 |      |
|                       | Trimethoprim         | Trimethoprim                                     | 30                                 |      |
| Hospital wastewaters  | Tetracyclines        | Tetracyclines                                    | 0.36-0.75                          | [23] |
|                       | Sulphonamides        | Sulphonamides                                    | 0.28-0.63                          |      |
|                       | Quinolones           | Quinolones                                       | 1.35-1.92                          |      |
| Hospital wastewaters  | Ciprofloxacin        | Quinolones                                       | 0.01-100                           | [24] |
|                       | Tamoxifen            | Anti-neoplastic agents                           | 0.01-10                            |      |
|                       | Cyclophosphamide     | Anti-neoplastic agents                           | 0.01-10                            |      |
| Hospital wastewaters  | Metronidazole        | Nitroimidazoles                                  | 36.5                               | [25] |
|                       | Ciprofloxacin        | Quinolones                                       | 42.8                               |      |
| Swine wastewaters     | Sulfamethazine       | Sulphonamides                                    | 0.44-324                           | [27] |
|                       | Tetracycline         | Tetracyclines                                    | 1.45-388                           |      |
|                       | Tylosin              | Macrolides                                       | 8.6-72                             |      |
|                       | 17β-Estradiol        | Hormones                                         | 0.008-0.54                         |      |
| Municipal wastewaters | 17α-Ethynylestradiol | Hormones                                         | 0.18-0.36                          | [28] |
|                       | Acetaminophen        | Fever and pain treatment medicines               | 3.6-99.6                           |      |
| Municipal wastewaters | Diclofenac           | NSAIDs                                           | 0.88-4                             | [29] |
|                       | Carbamazepine        | Anti-epileptic agents                            | ~0.2                               |      |
| Municipal wastewaters | Ibuprofen            | NSAIDs                                           | 23                                 | [30] |
|                       | Naproxen             | NSAIDs                                           | 14                                 |      |
|                       | Triclosan            | Disinfectants                                    | 1                                  |      |
| Municipal wastewaters | 17β-Estradiol        | Hormones                                         | 0.5                                | [31] |
| Sewage                | Amoxicillin          | β-lactams                                        | ≤6.9                               | [32] |
|                       | Sulfamethoxazole     | Sulphonamides                                    | ≤5.5                               |      |
|                       | Ciprofloxacin        | Quinolones                                       | ≤4.6                               |      |
|                       | Doxycycline          | Tetracycline                                     | ≤2.2                               |      |
|                       | Erythromycin         | Macrolides                                       | ≤10                                |      |
| Wastewater            | Chloramphenicol      | Phenicol                                         | 3.3                                | [33] |
|                       | Thiamphenicol        | Phenicol                                         | 1.2                                |      |
|                       | Florfenicol          | Phenicol                                         | 3.3                                |      |
|                       | Neomycin             | Aminoglycosides                                  | 12                                 |      |
| Sewage                | Methylparaben        | Antiseptic/preservative/disinfectant ingredients | 15                                 | [35] |
|                       | Isobutylparaben      |                                                  | 0.13                               |      |
|                       | Butylparaben         |                                                  | 0.87                               |      |
|                       | Triclosan            |                                                  | 3.4                                |      |
|                       | Triclocarban         |                                                  | 0.11                               |      |

|                   |               |                       |        |      |
|-------------------|---------------|-----------------------|--------|------|
| Sewage            | Amitriptyline |                       | ≤5.1   | [36] |
|                   | Fluoxetine    |                       | ≤3.6   |      |
|                   | Sertraline    | Antidepressants       | ≤0.11  |      |
|                   | Citalopram    |                       | ≤0.65  |      |
|                   | Paroxetine    |                       | <32.2  |      |
| Wastewater        | Gemfibrozil   |                       | 0.003  | [37] |
|                   | Bezafibrate   | Lipid regulators      | 0.004  |      |
|                   | Fenofibrate   |                       | 0.0005 |      |
| Landfill leachate | Ibuprofen     | NSAIDs                | 167    | [38] |
|                   | Naproxen      | NSAIDs                | 520    |      |
|                   | Carbamazepine | Anti-epileptic agents | 1000   |      |

**Table S2.** The effect of toxicants (PHRs and PCPs) on the growth of different microalgae and cyanobacteria strains.

| Strain                                 | Toxicant        | Concentration       | Exposure time | Effect on growth     | Effect on metabolism                                  | Ref. |
|----------------------------------------|-----------------|---------------------|---------------|----------------------|-------------------------------------------------------|------|
| <i>Antibiotics-phenicols</i>           |                 |                     |               |                      |                                                       |      |
| <i>Pseudokirchmeriella subcapitata</i> |                 | 2.7 mg/L            |               |                      |                                                       |      |
| <i>Scenedesmus quadricauda</i>         | Chloramphenicol | 0.89 mg/L           | 96 h          | A 50% inhibition     | Changes in compositions of lipids, proteins and DNA.  | [40] |
| <i>Scenedesmus obliquus</i>            |                 | 1.19 mg/L           |               |                      |                                                       |      |
| <i>Scenedesmus acuminatus</i>          |                 | 2.28 mg/L           |               |                      |                                                       |      |
| <i>Chlorella pyrenoidosa</i>           | Chloramphenicol | 14 mg/L             | 96 h          | A 50% reduction      | n.d.                                                  | [41] |
|                                        | Florphenicol    | 215 mg/L            |               |                      |                                                       |      |
|                                        | Thiamphenicol   | 1283 mg/L           |               |                      |                                                       |      |
| <i>Chlorella pyrenoidosa</i>           | Florphenicol    | 14.2 mg/L (39.7 μM) | 96 h          | A 50% inhibition     | n.d.                                                  | [51] |
| <i>Chlorella</i> sp.                   | Florfenicol     | ≥86 mg/L            | 16-20 days    | A 45-100% inhibition | Increase in MDA content and SOD activity.             | [52] |
| <i>Chlorella vulgaris</i>              |                 | 522 mg/L            |               |                      |                                                       |      |
| <i>Selenastrum capricornutum</i>       | Thiamphenicol   | 8.9 mg/L            | 72 h          | A 50% inhibition     | n.d.                                                  | [45] |
| <i>Pseudokirchmeriella subcapitata</i> | Florphenicol    | 2.9 mg/L            | 72 h          | A 50% toxicity       | n.d.                                                  | [48] |
| <i>Scenedesmus vacuolatus</i>          | Florphenicol    | 18 mg/L             | 24 h          | A 50% inhibition     | n.d.                                                  | [50] |
| <i>Isochrysis galbana</i>              | Florphenicol    | 8 mg/L              |               |                      |                                                       |      |
|                                        | Chloramphenicol | 41 mg/L             | 96 h          | A 50% reduction      | n.d.                                                  | [41] |
|                                        | Thiamphenicol   | 158 mg/L            |               |                      |                                                       |      |
| <i>Desmodesmus subspicatus</i>         | Chloramphenicol | 0.47 mg/L – 1 mg/L  | 72 h          | A 50% toxicity       | n.d.                                                  | [39] |
| <i>Isochrysis galbana</i>              | Chloramphenicol | 12 mg/L             | 15 days       | A 22% inhibition     | n.d.                                                  | [43] |
| <i>Tetraselmis chuii</i>               | Florphenicol    | 1.3 mg/L            |               |                      |                                                       |      |
|                                        | Chloramphenicol | 4 mg/L              | 96 h          | A 50% reduction      | n.d.                                                  | [41] |
|                                        | Thiamphenicol   | 38 mg/L             |               |                      |                                                       |      |
| <i>Tetraselmis suecica</i>             | Chloramphenicol | 11 mg/L             | 96 h          | A 50% inhibition     | Decrease in Chl <i>a</i> content (24 h, at ≥2.5 mg/L) | [42] |
|                                        | Florphenicol    | 9 mg/L              |               |                      |                                                       |      |
| <i>Tetraselmis chuii</i>               | Florphenicol    | 6-11 mg/L           | 72h-96 h      | A 50% inhibition     | n.d.                                                  | [49] |

|                                        |                                 |                             |         |                                             |                                                                            |      |          |         |                                                                |      |      |
|----------------------------------------|---------------------------------|-----------------------------|---------|---------------------------------------------|----------------------------------------------------------------------------|------|----------|---------|----------------------------------------------------------------|------|------|
| <i>Skeletonema costatum</i>            | Florfenicol                     | 5 mg/L                      | 96 h    | A 50% inhibition                            | n.d.                                                                       | [53] |          |         |                                                                |      |      |
| <i>Chaetoceros gracilis</i>            | Chloramphenicol                 | 12 mg/L                     | 15 days | Almost complete growth suppression          | n.d.                                                                       | [43] |          |         |                                                                |      |      |
| <i>Nostoc flagelliforme</i>            | Chloromycetin (Chloramphenicol) | ≥25 mg/L                    | 12 days | Almost complete growth suppression          | Decrease in Chl <i>a</i> content                                           | [44] |          |         |                                                                |      |      |
| <i>Microcystis flosaquae</i>           | Florfenicol                     | 0.05 mg/L (50 µg/L)         | 7 days  | ~50% reduction in chlorophyll concentration | Increase in MDA content. Increase in CAT and SOD activity.                 | [46] |          |         |                                                                |      |      |
|                                        | Thiamphenicol                   | 0.1 mg/L (100 µg/L)         | 7 days  |                                             |                                                                            |      |          |         |                                                                |      |      |
| <i>Anabaena cylindrica</i>             | Thiamphenicol                   | 1.3 mg/L                    | 144 h   | A 50% inhibition                            | n.d.                                                                       | [47] |          |         |                                                                |      |      |
| <i>Anabaena flosaquae</i>              |                                 | 13 mg/L                     |         |                                             |                                                                            |      |          |         |                                                                |      |      |
| <i>Anabaena variabilis</i>             |                                 | 14 mg/L                     |         |                                             |                                                                            |      |          |         |                                                                |      |      |
| <i>Microcystis aeruginosa</i>          |                                 | 0.32 mg/L                   |         |                                             |                                                                            |      |          |         |                                                                |      |      |
| <i>Microcystis wesenbergii</i>         |                                 | 0.43 mg/L                   |         |                                             |                                                                            |      |          |         |                                                                |      |      |
| <i>Nostoc</i> sp.                      |                                 | 3.5 mg/L                    |         |                                             |                                                                            |      |          |         |                                                                |      |      |
| <i>Synechococcus leopoldensis</i>      |                                 | 0.36 mg/L                   |         |                                             |                                                                            |      |          |         |                                                                |      |      |
| <i>Synechococcus</i> sp.               |                                 | 0.67 mg/L                   |         |                                             |                                                                            |      |          |         |                                                                |      |      |
| <i>Antibiotics-tetracyclines</i>       |                                 |                             |         |                                             |                                                                            |      |          |         |                                                                |      |      |
| <i>Dictyosphaerium pulchellum</i>      |                                 | Tetracycline                |         |                                             |                                                                            |      | ≥10 mg/L | 11 days | A 100% inhibition<br>Up to 35% inhibition<br>A ~50% inhibition | n.d. | [54] |
| <i>Micractinium pusillum</i>           | 10 mg/L                         |                             |         |                                             |                                                                            |      |          |         |                                                                |      |      |
|                                        | 20 mg/L                         |                             |         |                                             |                                                                            |      |          |         |                                                                |      |      |
| <i>Scenedesmus obliquus</i>            | Tetracycline                    | 0.28 mg/L (0.63 µM)         | 72 h    | A 50% inhibition                            | n.d.                                                                       | [59] |          |         |                                                                |      |      |
| <i>Pseudokirchneriella subcapitata</i> | Tetracycline                    | 1.82 mg/L                   | 72 h    | A 50% toxicity                              | n.d.                                                                       | [58] |          |         |                                                                |      |      |
| <i>Pseudokirchneriella subcapitata</i> | Tetracycline                    | 3.3 mg/L                    | 72 h    | A 50% toxicity                              | n.d.                                                                       | [55] |          |         |                                                                |      |      |
| <i>Anabaena</i>                        |                                 | 6.2 mg/L                    |         |                                             |                                                                            |      |          |         |                                                                |      |      |
| <i>Selenastrum capricornutum</i>       | Tetracycline                    | 2.2 mg/L                    | 3 days  | A 50% toxicity                              | n.d.                                                                       | [56] |          |         |                                                                |      |      |
| <i>Microcystis aeruginosa</i>          |                                 | 0.09 mg/L                   | 7 days  |                                             |                                                                            |      |          |         |                                                                |      |      |
| <i>Selenastrum capricornutum</i>       | Tetracycline                    | 1 mg/L                      | 7 days  | A 43% inhibition                            | Increase in MDA content, increase in SOD activity                          | [57] |          |         |                                                                |      |      |
| <i>Microcystis aeruginosa</i>          |                                 |                             |         | A 35% inhibition                            |                                                                            |      |          |         |                                                                |      |      |
| <i>Synechocystis</i>                   | Tetracycline                    | 0.01-0.1 mg/L (10-100 µg/L) | 5 days  | A 20% inhibition                            | n.d.                                                                       | [62] |          |         |                                                                |      |      |
| <i>Microcystis aeruginosa</i>          | Tetracycline                    | 5 mg/L                      | 6 days  | A ~45% inhibition                           | Inhibition of MC-LR production                                             | [60] |          |         |                                                                |      |      |
| <i>Nostoc flagelliforme</i>            | Tetracycline                    | 100 mg/L                    | 12 days | A ~50% inhibition                           | Decrease in Chl <i>a</i> content, increase in exopolysaccharide production | [44] |          |         |                                                                |      |      |
| <i>Microcystis aeruginosa</i>          | Tetracycline                    | ≥0.05 mg/L                  | 13 days | A ≥50% inhibition                           | n.d.                                                                       | [61] |          |         |                                                                |      |      |
| <i>Aphanizomenon gracile</i>           |                                 | ≥0.0015 mg/L                |         |                                             |                                                                            |      |          |         |                                                                |      |      |

|                                                                                               |                   |                                                    |        |                                               |                                                    |      |
|-----------------------------------------------------------------------------------------------|-------------------|----------------------------------------------------|--------|-----------------------------------------------|----------------------------------------------------|------|
| <i>Chrisosporum berghii</i><br><i>Planktotrix agardhii</i>                                    |                   | >0.1-0.2 mg/L                                      |        | A ≥50% inhibition                             |                                                    |      |
|                                                                                               |                   | 0.003 mg/L                                         |        | A >50% inhibition                             |                                                    |      |
| <i>Pseudokirchmeriella subcapitata</i><br><i>Ankistrodesmus fusiformis</i>                    | Chlortetracycline | 1.2 mg/L                                           | 96 h   | A 50% reduction                               | n.d.                                               | [63] |
| <i>Selenastrum capricornutum</i><br><i>Microcystis aeruginosa</i>                             | Chlortetracycline | 3.1 mg/L                                           | 3 days | A 50% toxicity                                | n.d.                                               | [56] |
|                                                                                               |                   | 0.05 mg/L                                          | 7 days |                                               |                                                    |      |
| <i>Chlorella pyrenoidosa</i><br><i>Microcystis aeruginosa</i>                                 | Chlortetracycline | 37.8 mg/L (73.4 μmol/L)<br>15.2 mg/L (29.5 μmol/L) | 96 h   | A 50% toxicity                                | Increase in MDA content, increase in SOD activity. | [64] |
| <i>Microcystis aeruginosa</i>                                                                 | Chlortetracycline | 20 mg/L                                            | 6 days | A 100% inhibition                             | Inhibition of MC-LR intracellular production       | [60] |
| <i>Tetraselmis suecica</i>                                                                    | Oxytetracycline   | 17 mg/L                                            | 96 h   | A 50% inhibition                              | Whole cell (at 10 mg/L)                            | [42] |
| <i>Tetraselmis chunii</i>                                                                     | Oxytetracycline   | 11 mg/L                                            | 96 h   | A 50% inhibition                              | n.d.                                               | [49] |
| <i>Scenedesmus vacuolatus</i>                                                                 | Oxytetracycline   | 40 mg/L                                            | 24 h   | A 50% inhibition                              | n.d.                                               | [50] |
| <i>Chlorella vulgaris</i><br><i>Selenastrum capricornutum</i>                                 | Oxytetracycline   | 7 mg/L                                             | 72 h   | A 50% inhibition                              | n.d.                                               | [45] |
| <i>Pseudokirchmeriella subcapitata</i>                                                        | Oxytetracycline   | 0.34 mg/L                                          | 72 h   | A 50% toxicity                                | n.d.                                               | [48] |
| <i>Pseudokirchmeriella subcapitata</i>                                                        | Oxytetracycline   | 2.54 mg/L                                          | 72 h   | A 50% toxicity                                | n.d.                                               | [65] |
| <i>Pseudokirchmeriella subcapitata</i><br><i>Ankistrodesmus fusiformis</i>                    | Oxytetracycline   | 0.17 mg/L                                          | 72 h   | A 50% toxicity                                | n.d.                                               | [63] |
| <i>Pseudokirchmeriella subcapitata</i><br><i>Microcystis aeruginosa</i>                       | Oxytetracycline   | 0.64 mg/L                                          | 96 h   | A 50% reduction                               | n.d.                                               | [63] |
|                                                                                               |                   | 4.17 mg/L                                          |        |                                               |                                                    |      |
| <i>Pseudokirchmeriella subcapitata</i><br><i>Microcystis aeruginosa</i>                       | Oxytetracycline   | 0.6 mg/L                                           | 1 day  | A 50% inhibition in photosynthetic efficiency | n.d.                                               | [66] |
|                                                                                               |                   | 5.4 mg/L                                           |        |                                               |                                                    |      |
| <i>Pseudokirchmeriella subcapitata</i><br><i>Anabaena flosaquae</i>                           | Oxytetracycline   | 1 mg/L                                             | 72 h   | A 50% toxicity                                | n.d.                                               | [67] |
|                                                                                               |                   | 2.7 mg/L                                           |        |                                               |                                                    |      |
| <i>Selenastrum capricornutum</i><br><i>Rhodomonas salina</i><br><i>Microcystis aeruginosa</i> | Oxytetracycline   | 4.5 mg/L                                           | -      | A 50% toxicity                                | -                                                  | [68] |
|                                                                                               |                   | 1.6 mg/L                                           |        |                                               |                                                    |      |
| <i>Microcystis aeruginosa</i>                                                                 | Oxytetracycline   | 0.207 mg/L                                         |        |                                               |                                                    |      |
| <i>Microcystis aeruginosa</i>                                                                 | Oxytetracycline   | 0.01-1 mg/L                                        | 9 days | Up to 19% inhibition                          | Change in antioxidant activity (SOD, POD, CAT).    | [69] |
| <i>Microcystis aeruginosa</i>                                                                 | Oxytetracycline   | 1-10 mg/L                                          | 6 days | Up to ~57% inhibition                         | Interference with toxin production                 | [60] |

|                                        |                 |                          |           |                                              |                                                   |      |
|----------------------------------------|-----------------|--------------------------|-----------|----------------------------------------------|---------------------------------------------------|------|
| <i>Anabaena cylindrica</i>             |                 | 0.032 mg/L               |           |                                              |                                                   |      |
| <i>Anabaena flosaquae</i>              |                 | 0.39 mg/L                |           |                                              |                                                   |      |
| <i>Anabaena variabilis</i>             | Oxytetracycline | 0.36 mg/L                | 144 h     | A 50% inhibition                             | n.d.                                              | [47] |
| <i>Microcystis aeruginosa</i>          |                 | 0.23 mg/L                |           |                                              |                                                   |      |
| <i>Microcystis wesenbergii</i>         |                 | 0.35 mg/L                |           |                                              |                                                   |      |
| <i>Nostoc</i> sp.                      |                 | 7 mg/L                   |           |                                              |                                                   |      |
| <i>Synechococcus leopoldensis</i>      |                 | 1.1 mg/L                 |           |                                              |                                                   |      |
| <i>Synechococcus</i> sp.               |                 | 2 mg/L                   |           |                                              |                                                   |      |
| <i>Tetraselmis chuii</i>               | Doxycycline     | 22 mg/L                  | 96 h      | A 50% reduction                              | n.d.                                              | [70] |
| <i>Pseudokirchmeriella subcapitata</i> | Doxycycline     | 0.33 mg/L                | 72 h      | A 50% toxicity                               | n.d.                                              | [48] |
| <i>Microcystis aeruginosa</i>          | Doxycycline     | 1 mg/L                   | 24 h      | A 8% inhibition                              | Increase in MDA content, increase in CAT activity | [71] |
|                                        |                 | 1 mg/L                   | 96 h      | A 55% inhibition                             | n.d.                                              |      |
| <i>Microcystis aeruginosa</i>          | Minocycline     | 0.45 mg/L (0.92 $\mu$ M) | 6-10 days | A 50% inhibition                             | n.d.                                              | [72] |
| <i>Antibiotics-aminoglycosides</i>     |                 |                          |           |                                              |                                                   |      |
| <i>Chlorella vulgaris</i>              | Streptomycin    | 2.4 mg/L                 | 72 h      | A 40% inhibition                             | Decrease in D1 protein                            | [73] |
| <i>Selenastrum capricornutum</i>       | Streptomycin    | 0.133 mg/L               | 3 days    | A 50% inhibition                             | n.d.                                              | [56] |
| <i>Microcystis aeruginosa</i>          |                 | 0.007 mg/L               | 7 days    |                                              |                                                   |      |
| <i>Pseudokirchmeriella subcapitata</i> | Streptomycin    | 1.5 mg/L                 |           | 50% inhibition in photosynthetic efficiency  | n.d.                                              | [66] |
| <i>Microcystis aeruginosa</i>          |                 | 0.034 mg/L               | 24 h      |                                              |                                                   |      |
| <i>Dictyosphaerium pulchellum</i>      | Kanamycin       | 5-30 mg/L                | 11 days   | Complete inhibition                          |                                                   | [54] |
| <i>Micractinium pusillum</i>           |                 |                          |           | A 25%(at 5 mg/L)-100%(at 30 mg/L) inhibition | n.d.                                              |      |
| <i>Microcystis aeruginosa</i>          |                 |                          |           |                                              |                                                   |      |
| <i>Aphanizomenon gracile</i>           | Kanamycin       | 0.1-1.6 mg/L             | 13 days   | $\geq$ 50% growth inhibitions                | n.d.                                              | [61] |
| <i>Planktotrix agardhii</i>            |                 |                          |           |                                              |                                                   |      |
| <i>Chrisosporum berghii</i>            |                 | $\geq$ 0.2 mg/L          |           |                                              |                                                   |      |
| <i>Pseudokirchmeriella subcapitata</i> | Gentamicin      | 19.2 mg/L                | 72 h      | A 50% inhibition                             | n.d.                                              | [75] |
| <i>Microcystis aeruginosa</i>          |                 |                          |           |                                              |                                                   |      |
| <i>Aphanizomenon gracile</i>           | Gentamicin      | 0.1-1.6 mg/L             | 13 days   | $\geq$ 50% growth inhibitions                | n.d.                                              | [61] |
| <i>Planktotrix agardhii</i>            |                 |                          |           |                                              |                                                   |      |

|                                  |                        |                          |         |                                        |                                                                               |      |
|----------------------------------|------------------------|--------------------------|---------|----------------------------------------|-------------------------------------------------------------------------------|------|
| <i>Chrisosporum bergonii</i>     |                        | ≥0.2 mg/L                |         |                                        |                                                                               |      |
|                                  | Gentamicin (sulfate)   | ≥25 mg/L                 |         |                                        |                                                                               |      |
| <i>Nostoc flagelliforme</i>      | Spectinomycin          | ≥5 mg/L                  | 12 days | Complete growth suppression            | Increase in exopolysaccharide production<br>Decrease in Chl <i>a</i> content  |      |
|                                  | Streptomycin (sulfate) | ≥1 mg/L                  |         |                                        | Decrease in Chl <i>a</i> content and increase in exopolysaccharide production | [44] |
|                                  | Kanamycin (sulfate)    | 1-100 mg/L               |         | Up to 27% growth inhibition            | Increase in exopolysaccharide production                                      |      |
| <i>Microcystis aeruginosa</i>    |                        | 0.28 mg/L                |         |                                        |                                                                               |      |
| <i>Lyngbya</i> sp.               |                        | 0.09 mg/L                |         |                                        |                                                                               |      |
| <i>Oscillatoria tenuis</i>       |                        | 0.28 mg/L                |         |                                        |                                                                               |      |
| <i>Anabaena cylindrica</i>       |                        |                          |         |                                        |                                                                               |      |
| <i>Anabaena flosaquae</i>        |                        | 0.28 mg/L                |         |                                        |                                                                               |      |
| <i>Aphanizomenon flosaquae</i>   |                        | 0.28 mg/L                |         |                                        |                                                                               |      |
| <i>Chlamydomonas reinhardtii</i> |                        | 0.86 mg/L                |         |                                        |                                                                               |      |
| <i>Pediastrum</i> sp.            | Streptomycin sulfate   | 0.66 mg/L                | -       | MIC (Minimum Inhibitory Concentration) | n.d.                                                                          | [74] |
| <i>Chlorella vulgaris</i>        |                        | 2.1 mg/L                 |         |                                        |                                                                               |      |
| <i>Ankistrodesmus</i> sp.        |                        | 66 mg/L                  |         |                                        |                                                                               |      |
| <i>Selenastrum capricornutum</i> |                        | 6.6 mg/L                 |         |                                        |                                                                               |      |
| <i>Scenedesmus obliquus</i>      |                        | 2.1 mg/L                 |         |                                        |                                                                               |      |
| <i>Ulothrix</i> sp.              |                        |                          |         |                                        |                                                                               |      |
| <i>Stigeoclonium</i> sp.         |                        | 21 mg/L                  |         |                                        |                                                                               |      |
| <i>Navicula</i> sp.              |                        | 21 mg/L                  |         |                                        |                                                                               |      |
|                                  |                        | 6.6 mg/L                 |         |                                        |                                                                               |      |
|                                  |                        | 6.6 mg/L                 |         |                                        |                                                                               |      |
| <i>Antibiotics-sulphonamides</i> |                        |                          |         |                                        |                                                                               |      |
| <i>Chlorella vulgaris</i>        | Sulfamethoxazole       | 0.98-1.51 mg/L           |         |                                        |                                                                               |      |
|                                  | Sulfapyridine          | 1-1.93 mg/L              | 48-72 h | A 50% inhibition                       | n.d.                                                                          | [78] |
|                                  | Sulfadimethoxine       | 5.19-7.65 mg/L           |         |                                        |                                                                               |      |
| <i>Chlorella vulgaris</i>        | Sulfadimethoxine       | 11.2 mg/L                | 72 h    | A 50% inhibition                       | n.d.                                                                          | [45] |
| <i>Chlorella vulgaris</i>        | Sulfacetamide          | 14.6 mg/L<br>(0.062 mM)  |         |                                        |                                                                               |      |
|                                  | Sulfamethoxazole       | 1.57 mg/L<br>(0.0062 mM) | 48 h    | A 50% inhibition                       | n.d.                                                                          | [79] |
|                                  | Sulfadiazine           | 1.33 mg/L<br>(0.0049 mM) |         |                                        |                                                                               |      |
|                                  | Sulfathiazole          | 17.74 mg/L<br>(0.064 mM) |         |                                        |                                                                               |      |
| <i>Scenedesmus vacuolatus</i>    | Sulfamethoxazole       | 1.54 mg/L                |         |                                        |                                                                               |      |
|                                  | Sulfapyridine          | 5.28 mg/L                |         |                                        |                                                                               |      |
|                                  | Sulfadimethoxine       | 9.85 mg/L                | 24 h    | A 50% inhibition                       | n.d.                                                                          | [76] |
|                                  | Sulfamerazine          | 11.9 mg/L                |         |                                        |                                                                               |      |

|                                                                                                              |                                                      |                                      |        |                                                |                                       |      |
|--------------------------------------------------------------------------------------------------------------|------------------------------------------------------|--------------------------------------|--------|------------------------------------------------|---------------------------------------|------|
|                                                                                                              | Sulfadimidine<br>(sulfamethazine)                    | 19.52 mg/L                           |        |                                                |                                       |      |
| <i>Scenedesmus obliquus</i>                                                                                  | Sulfamethoxazole                                     | 0.12 mg/L                            | 96 h   | A 50% inhibition                               | n.d.                                  | [77] |
| <i>Desmodesmus subspicatus</i>                                                                               | Sulfamethazine                                       | 1.23 mg/L                            |        |                                                |                                       |      |
| <i>Desmodesmus subspicatus</i>                                                                               | Sulfamethoxazole                                     | 0.25 mg/L (250 µg/L)                 | -      | Complete inhibition in photosynthetic activity | n.d.                                  | [83] |
| <i>Desmodesmus subspicatus</i>                                                                               | Sulfamethoxazole                                     | 210 mg/L                             | -      | A 50% inhibition in photosynthetic activity    | n.d.                                  | [84] |
| <i>Chlorella pyrenoidosa</i>                                                                                 | Sulfamethazine                                       | 8 mg/L                               | 5 days | A 45% inhibition                               | Increase in SOD, CAT and GST activity | [85] |
| <i>Selenastrum capricornutum</i>                                                                             | Sulfamethoxazole                                     | 2.5 mg/L                             | 96 h   | A ~25% growth inhibition                       | Decrease in Chl <i>a</i> content      | [80] |
| <i>Selenastrum capricornutum</i>                                                                             | Sulfadimethoxine<br>Sulfamethoxazole<br>Sulfadiazine | 2.3 mg/L<br>1.5 mg/L<br>2.2 mg/L     | 72 h   | A 50% inhibition                               | n.d.                                  | [45] |
| <i>Phaeodactylum tricorutum</i><br><i>Isochrysis galbana</i>                                                 | Sulfadiazine                                         | 0.11 mg/L<br>1.44 mg/L               | 96 h   | A 50% inhibition                               | n.d.                                  | [87] |
| <i>Selenastrum capricornutum</i><br><i>Rhodomonas salina</i><br><i>Microcystis aeruginosa</i>                | Sulfadiazine                                         | 7.8 mg/L<br>403 mg/L<br>0.135 mg/L   | -      | A 50% toxicity                                 | -                                     | [68] |
| <i>Chlorella vulgaris</i><br><i>Isochrysis galbana</i>                                                       | Sulfamonomethoxine                                   | 5.9 mg/L<br>9.7 mg/L                 | 72 h   | A 50% toxicity                                 | n.d.                                  | [88] |
| <i>Pseudokirchneriella subcapitata</i>                                                                       | Sulfamonomethoxine                                   | 1.34 mg/L                            | 72 h   | A 50% toxicity                                 | n.d.                                  | [48] |
| <i>Pseudokirchneriella subcapitata</i>                                                                       | Sulfamethoxazole                                     | 0.52 mg/L                            | 72 h   | A 50% toxicity                                 | n.d.                                  | [65] |
| <i>Pseudokirchneriella subcapitata</i>                                                                       | Sulfamethoxazole<br>Sulfamethazine                   | 1.9 mg/L<br>8.7 mg/L                 | 72 h   | A 50% inhibition                               | n.d.                                  | [81] |
| <i>Microcystis aeruginosa</i><br><i>Pseudokirchneriella subcapitata</i>                                      | Sulfamethoxazole                                     | 0.55 mg/L<br>>9 mg/L                 | 24 h   | 50% inhibition in photosynthetic efficiency    | n.d.                                  | [66] |
| <i>Pseudokirchneriella subcapitata</i><br><i>Cyclotella meneghiniana</i><br><i>Synechococcus leopolensis</i> | Sulfamethoxazole                                     | 0.146 mg/L<br>2.4 mg/L<br>0.027 mg/L | 96 h   | A 50% toxicity                                 | n.d.                                  | [82] |
| <i>Anabaena cylindrica</i><br><i>Anabaena flosaquae</i><br><i>Anabaena variabilis</i>                        | Sulfadimethoxine                                     | 480 mg/L<br>>2000 mg/L<br>1500 mg/L  | 144 h  | A 50% inhibition                               | n.d.                                  | [47] |
| <i>Microcystis aeruginosa</i><br><i>Microcystis wesenbergii</i>                                              |                                                      | 500 mg/L<br>470 mg/L                 |        |                                                |                                       |      |

|                                          |                |                                  |         |                                                  |      |      |
|------------------------------------------|----------------|----------------------------------|---------|--------------------------------------------------|------|------|
| <i>Nostoc</i> sp.                        |                | >2000 mg/L                       |         |                                                  |      |      |
| <i>Synechococcus leopoldensis</i>        |                | 1100 mg/L                        |         |                                                  |      |      |
| <i>Synechococcus</i> sp.                 |                | 760 mg/L                         |         |                                                  |      |      |
| <i>Spirulina platensis</i>               | Sulfamethazine | 6 mg/L                           | 48 h    | A 50% inhibition                                 | n.d. | [86] |
| <i>Antibiotics-trimethoprim</i>          |                |                                  |         |                                                  |      |      |
| <i>Pseudokirchneriella subcapitata</i>   | Trimethoprim   | 40 mg/L                          | 72 h    | A 50% inhibition                                 | n.d. | [81] |
| <i>Pseudokirchneriella subcapitata</i>   | Trimethoprim   | 84 mg/L                          | 96 h    | A 50% inhibition                                 | n.d. | [89] |
| <i>Selenastrum capricornutum</i>         | Trimethoprim   | 80 mg/L                          | 72 h    | A 50% inhibition                                 | n.d. | [45] |
| <i>Chlorella vulgaris</i>                | Trimethoprim   | 90 mg/L                          | 72 h    | A 50% inhibition                                 | n.d. | [78] |
|                                          |                | 123 mg/L                         | 48 h    |                                                  |      |      |
| <i>Navicula pelliculosa</i>              |                | 2.13 mg/L [7.36 µmol/L]          |         |                                                  |      |      |
| <i>Phaeodactylum tricorutum</i>          | Trimethoprim   | 21.6 mg/L [74.6 µmol/L]          | 96 h    | A 50% inhibition                                 | n.d. | [91] |
| <i>Anabaena flosaquae</i>                |                | 83 mg/L [285 µmol/L]             |         |                                                  |      |      |
| <i>Phaeodactylum tricorutum</i>          | Trimethoprim   | 5.1 mg/L                         | 72 h    | A 50% inhibition                                 | n.d. | [90] |
| <i>Aphanizomenon gracile</i>             | Trimethoprim   | 0.003-1.6 mg/L                   | 13 days | Up to 50% inhibition                             | n.d. | [61] |
| <i>Anabaena cylindrica</i>               |                | >200 mg/L                        |         |                                                  |      |      |
| <i>Anabaena flosaquae</i>                |                | >200 mg/L                        |         |                                                  |      |      |
| <i>Anabaena variabilis</i>               | Trimethoprim   | 11 mg/L                          | 144 h   | A 50% inhibition                                 | n.d. | [47] |
| <i>Microcystis aeruginosa</i>            |                | 150 mg/L                         |         |                                                  |      |      |
| <i>Microcystis wesenbergii</i>           |                | >200 mg/L                        |         |                                                  |      |      |
| <i>Nostoc</i> sp.                        |                | 53 mg/L                          |         |                                                  |      |      |
| <i>Synechococcus leopoldensis</i>        |                | >200 mg/L                        |         |                                                  |      |      |
| <i>Synechococcus</i> sp.                 |                | >200 mg/L                        |         |                                                  |      |      |
| <i>Pseudokirchneriella subcapitata</i>   | Trimethoprim   | 129 mg/L                         | 72 h    | A 50% toxicity                                   | n.d. | [67] |
| <i>Anabaena flosaquae</i>                |                | 253 mg/L                         |         |                                                  |      |      |
| <i>Pseudokirchneriella subcapitata</i>   | Trimethoprim   | >9 mg/L                          | 24 h    | A 50% inhibition in photosynthetic efficiency    | n.d. | [66] |
| <i>Microcystis aeruginosa</i>            |                | 6.9 mg/L                         |         |                                                  |      |      |
| <i>Selenastrum capricornutum</i>         |                | 130 mg/L                         |         |                                                  |      |      |
| <i>Rhodomonas salina</i>                 | Trimethoprim   | 16 mg/L                          | -       | A 50% toxicity                                   | -    | [68] |
| <i>Microcystis aeruginosa</i>            |                | 112 mg/L                         |         |                                                  |      |      |
| <i>Desmodesmus subspicatus</i>           | Trimethoprim   | 0.0078-0.125 mg/L (7.8-125 µg/L) | -       | A 34%±6% inhibition in photosynthetic efficiency | n.d. | [83] |
| <i>Antibiotics-β-lactams</i>             |                |                                  |         |                                                  |      |      |
| <i>Antibiotics-β-lactams-penicillins</i> |                |                                  |         |                                                  |      |      |



|                                                                                                                                                                                                                                                |                                    |                                                                                                          |                  |                                        |                                                                  |      |
|------------------------------------------------------------------------------------------------------------------------------------------------------------------------------------------------------------------------------------------------|------------------------------------|----------------------------------------------------------------------------------------------------------|------------------|----------------------------------------|------------------------------------------------------------------|------|
| <i>Microcystis aeruginosa</i><br><i>Selenastrum capricornutum</i>                                                                                                                                                                              | Benzylpenicillin<br>(Penicillin G) | 0.006 mg/L<br>100 mg/L                                                                                   | 7 days<br>3 days | A 50%<br>inhibition<br>No inhibition   | n.d.                                                             | [56] |
| <i>Pseudokirchmeriella subcapitata</i>                                                                                                                                                                                                         | Penicillin G                       | 7114 mg/L                                                                                                | 72 h             | A 50% toxicity                         | n.d.                                                             | [58] |
| <i>Antibiotics-β-lactams-aminopenicillins</i>                                                                                                                                                                                                  |                                    |                                                                                                          |                  |                                        |                                                                  |      |
| <i>Anabaena cylindrica</i><br><i>Anabaena flosaquae</i><br><i>Anabaena variabilis</i><br><i>Microcystis aeruginosa</i><br><i>Microcystis wesenbergii</i><br><i>Nostoc</i> sp.<br><i>Synechococcus leopoldensis</i><br><i>Synechococcus</i> sp. | Ampicillin                         | 0.14 mg/L<br>3.3 mg/L<br>2.2 mg/L<br>0.0002 mg/L<br>0.013 mg/L<br>>200 mg/L<br>0.083 mg/L<br>0.0069 mg/L | 144 h            | A 50%<br>inhibition                    | n.d.                                                             | [47] |
| <i>Microcystis aeruginosa</i><br><i>Aphanizomenon gracile</i><br><i>Chrisosporum berghii</i><br><i>Planktotrix agardhii</i>                                                                                                                    | Amoxicillin                        | ≥0.006 mg/L<br>≥0.0015 mg/L<br>≥0.0015 mg/L<br>≥0.006 mg/L                                               | 13 days          | A ≥50%<br>inhibition                   | n.d.                                                             | [61] |
| <i>Anabaena</i> sp.                                                                                                                                                                                                                            | Amoxicillin                        | 56 mg/L                                                                                                  | 72 h             | A 50% toxicity                         | n.d.                                                             | [55] |
| <i>Synechococcus leopoldensis</i>                                                                                                                                                                                                              | Amoxicillin                        | 2.2 μg/L                                                                                                 | 96 h             | A 50% toxicity                         | n.d.                                                             | [92] |
| <i>Nostoc flagelliforme</i>                                                                                                                                                                                                                    | Ampicillin                         | 25-50 mg/L<br>100 mg/L                                                                                   | 12 days          | A 55%<br>inhibition<br>100% inhibition | Stimulation in<br>exopolysaccharides<br>production (at ≥25 mg/L) | [44] |
| <i>Selenastrum capricornutum</i><br><i>Rhodomonas salina</i><br><i>Microcystis aeruginosa</i>                                                                                                                                                  | Amoxicillin                        | NOEC >250<br>mg/L<br>3108 mg/L<br>0.0037 mg/L                                                            | -                | A 50% toxicity                         | -                                                                | [68] |
| <i>Pseudokirchmeriella subcapitata</i>                                                                                                                                                                                                         | Amoxicillin Ampicillin             | 2000 mg/L<br>(2 g/L)                                                                                     | 72 h             | No inhibition                          | n.d.                                                             | [75] |
| <i>Pseudokirchmeriella subcapitata</i>                                                                                                                                                                                                         | Amoxicillin                        | 1500 mg/L<br>(1.5 g/L)                                                                                   | 72 h             | No toxicity                            | n.d.                                                             | [55] |
| <i>Pseudokirchmeriella subcapitata</i>                                                                                                                                                                                                         | Amoxicillin                        | ~500 mg/L                                                                                                | 48 h             | A 50% toxicity                         | n.d.                                                             | [48] |
| <i>Selenastrum capricornutum</i><br><i>Chlorella vulgaris</i>                                                                                                                                                                                  | Ampicillin                         | 1000 mg/L<br>(1 g/L)                                                                                     | 72 h             | No negative<br>influence               | n.d.                                                             | [45] |
| <i>Antibiotics-β-lactams-cephalosporins</i>                                                                                                                                                                                                    |                                    |                                                                                                          |                  |                                        |                                                                  |      |
| <i>Microcystis aeruginosa</i><br><i>Aphanizomenon gracile</i><br><i>Chrisosporum berghii</i><br><i>Planktotrix</i>                                                                                                                             | Ceftazidime                        | ≥0.05 mg/L<br>≥0.006 mg/L<br>≥0.05 mg/L                                                                  | 13 days          | A ≥50%<br>inhibition                   | n.d.                                                             | [61] |

|                                        |              |  |                                      |         |                            |                                                                                                                       |      |
|----------------------------------------|--------------|--|--------------------------------------|---------|----------------------------|-----------------------------------------------------------------------------------------------------------------------|------|
| <i>agardhii</i>                        |              |  |                                      |         |                            |                                                                                                                       |      |
|                                        |              |  | ≥0.1-0.2 mg/L                        |         |                            |                                                                                                                       |      |
| <i>Microcystis aeruginosa</i>          |              |  | ≥0.1-0.2 mg/L                        |         |                            |                                                                                                                       |      |
| <i>Aphanizomenon gracile</i>           | Ceftriaxone  |  | ≥0.003 mg/L                          | 13 days | A ≥50% inhibition          | n.d.                                                                                                                  | [61] |
| <i>Chrisosporum bergonii</i>           |              |  | ≥0.012 mg/L                          |         |                            |                                                                                                                       |      |
| <i>Planktotrix agardhii</i>            |              |  | ≥0.05-0.1 mg/L                       |         |                            |                                                                                                                       |      |
| <i>Microcystis aeruginosa</i>          | Cefradine    |  | ≥3 mg/L                              | 6 days  | Complete growth inhibition | n.d.                                                                                                                  | [94] |
| <i>Scenedesmus obliquus</i>            | Cefradine    |  | 12 mg/L                              | 12 days | A ~50% inhibition          | n.d.                                                                                                                  | [94] |
| <i>Scenedesmus</i> sp.                 | Ceftiofur    |  | 53.4 mg/L                            | 72 h    | No effect                  | n.d.                                                                                                                  | [93] |
|                                        | Cefapirin    |  | 43.6 mg/L                            |         |                            |                                                                                                                       |      |
| <i>Pseudokirchmeriella subcapitata</i> | Cefotaxime   |  | 430 mg/L                             | 72 h    | A 50% toxicity             | n.d.                                                                                                                  | [48] |
| <i>Pseudokirchmeriella subcapitata</i> | Cephalothin  |  | 600 mg/L                             | 72 h    | A 48% growth inhibition    | n.d.                                                                                                                  | [75] |
| <i>Selenastrum capricornutum</i>       | Cefazolin    |  | 1000 mg/L (1 g/L)                    | 72 h    | No negative influence      | n.d.                                                                                                                  | [45] |
| <i>Antibiotics-quinolones</i>          |              |  |                                      |         |                            |                                                                                                                       |      |
| <i>Chlamydomonas mexicana</i>          |              |  | 10.8 mg/L                            |         |                            |                                                                                                                       |      |
| <i>Scenedesmus obliquus</i>            |              |  | 9.86 mg/L                            |         |                            |                                                                                                                       |      |
| <i>Chlorella vulgaris</i>              | Enrofloxacin |  | 12.2 mg/L                            | 96 h    | A 50% inhibition           | Changes in pigment content. Increase in MDA content.                                                                  | [95] |
| <i>Ourococcus multisporus</i>          |              |  | 15 mg/L                              |         |                            |                                                                                                                       |      |
| <i>Micractinium resseri</i>            |              |  | 12 mg/L                              |         |                            |                                                                                                                       |      |
| <i>Scenedesmus obliquus</i>            | Enrofloxacin |  | 38-53 mg/L (different strains)       | 72 h    | A 50% inhibition           | n.d.                                                                                                                  | [96] |
| <i>Scenedesmus obliquus</i>            | Enrofloxacin |  | 45-88 mg/L                           | 24-96 h | A 50% inhibition           | For 96 h exposure: increase in protein content (at 24-96 mg/L), increase in MDA and proline content (at 80-120 mg/L). | [97] |
| <i>Pseudokirchmeriella subcapitata</i> | Enrofloxacin |  | 5.18 mg/L                            | 96 h    | A 50% inhibition           | n.d.                                                                                                                  | [98] |
| <i>Ankistrodesmus fusiformis</i>       |              |  | 10.6 mg/L                            |         |                            |                                                                                                                       |      |
| <i>Microcystis aeruginosa</i>          | Enrofloxacin |  | 0.031-0.054 mg/L (different strains) | 72 h    | A 50% inhibition           | n.d.                                                                                                                  | [96] |
| <i>Scenedesmus obliquus</i>            | Norfloxacin  |  | 38.5 mg/L                            | 96 h    | A 50% inhibition           | Changed catalase (CAT) activity, increased MDA content.                                                               | [99] |
| <i>Pseudokirchmeriella subcapitata</i> | Norfloxacin  |  | 18 mg/L                              | 72 h    | A 50% inhibition           | n.d.                                                                                                                  | [81] |
| <i>Pseudokirchmeriella subcapitata</i> | Norfloxacin  |  | 56.4 mg/L                            | 72 h    | A 50% toxicity             | n.d.                                                                                                                  | [48] |
| <i>Pseudokirchmeriella subcapitata</i> | Norfloxacin  |  | >80 mg/L                             | 72 h    | A 50% toxicity             | n.d.                                                                                                                  | [55] |
| <i>Anabaena</i>                        |              |  | 5.6 mg/L                             |         |                            |                                                                                                                       |      |

|                                        |               |                     |         |                            |                                                                                             |       |
|----------------------------------------|---------------|---------------------|---------|----------------------------|---------------------------------------------------------------------------------------------|-------|
| <i>cylindrica</i>                      |               | 0.053 mg/L          |         |                            |                                                                                             |       |
| <i>Anabaena flosaquae</i>              |               | 0.29 mg/L           |         |                            |                                                                                             |       |
| <i>Anabaena variabilis</i>             |               | 0.19 mg/L           | 144 h   | A 50% inhibition           | n.d.                                                                                        | [47]  |
| <i>Microcystis aeruginosa</i>          | Norfloxacin   | 0.062 mg/L          |         |                            |                                                                                             |       |
| <i>Microcystis wesenbergii</i>         |               | 0.038 mg/L          |         |                            |                                                                                             |       |
| <i>Nostoc</i> sp.                      |               | 1.7 mg/L            |         |                            |                                                                                             |       |
| <i>Synechococcus leopoldensis</i>      |               | 0.63 mg/L           |         |                            |                                                                                             |       |
| <i>Synechococcus</i> sp.               |               | 0.63 mg/L           |         |                            |                                                                                             |       |
| <i>Microcystis aeruginosa</i>          |               | >0.006 mg/L         |         |                            |                                                                                             |       |
| <i>Aphanizomenon gracile</i>           | Norfloxacin   | ≥0.025 mg/L         | 13 days | A ≥50% inhibition          | n.d.                                                                                        | [61]  |
| <i>Chroosporum bergii</i>              |               | ≥0.1-0.2 mg/L       |         |                            |                                                                                             |       |
| <i>Planktotrix agardhii</i>            |               | ≥0.8 mg/L           |         |                            |                                                                                             |       |
| <i>Chlorella vulgaris</i>              | Levofloxacin  | 58.6 mg/L           | 96 h    | A 50% inhibition           | n.d.                                                                                        | [100] |
| <i>Scenedesmus obliquus</i>            | Levofloxacin  | 65 mg/L             | 96 h    | A 50% inhibition           | n.d.                                                                                        | [101] |
| <i>Pseudokirchmeriella subcapitata</i> | Levofloxacin  | > 120 mg/L          | 72 h    | A 50% toxicity             | n.d.                                                                                        | [55]  |
| <i>Anabaena flosaquae</i>              | Levofloxacin  | 4.8 mg/L            | 7 days  | Complete growth inhibition | Increase in MDA content. Increase in CAT and SOD activity.                                  | [102] |
| <i>Chlorella vulgaris</i>              | Ciprofloxacin | 27-40 mg/L          | 48-96h  | A 50% inhibition           | n.d.                                                                                        | [104] |
| <i>Chlorella vulgaris</i>              | Ciprofloxacin | 20.6 mg/L           | 96h     | A 50% growth reduction     | Decrease in total glutathione (GSH), increase in catalase (CAT) activity                    | [105] |
| <i>Chlorella vulgaris</i>              | Ciprofloxacin | 31 mg/L             | 72/96h  | A 50% inhibition           | n.d.                                                                                        | [106] |
| <i>Chlorella pyrenoidosa</i>           | Ciprofloxacin | 100 mg/L - 150 mg/L | 8 days  | A ≥30% inhibition          | The whole cell                                                                              | [107] |
| <i>Chlamydomonas mexicana</i>          | Ciprofloxacin | 65 mg/L             | 96 h    | A 50% inhibition           | Increase in total <i>Chl</i> , total <i>Car</i> , MDA content and SOD activity (at 60 mg/L) | [108] |
| <i>Selenastrum capricornutum</i>       | Ciprofloxacin | 2.5 mg/L            | 96 h    | A 40% inhibition           | Decrease in <i>Chl a</i> , <i>Chl b</i> and Total <i>Car</i> content.                       | [80]  |
| <i>Pseudokirchmeriella subcapitata</i> | Ciprofloxacin | 6.7 mg/L            | 72 h    | A 50% inhibition           | n.d.                                                                                        | [81]  |
| <i>Pseudokirchmeriella subcapitata</i> | Ciprofloxacin | 11.3 mg/L           | 72 h    | A 50% inhibition           | n.d.                                                                                        | [75]  |
| <i>Pseudokirchmeriella subcapitata</i> | Ciprofloxacin | 8.8 mg/L            | 72 h    | A 50% toxicity             | n.d.                                                                                        | [48]  |
| <i>Scenedesmus obliquus</i>            |               | 6.8 mg/L            |         |                            |                                                                                             |       |
| <i>Raphidocelis subcapitata</i>        | Ciprofloxacin | 6.7 mg/L            | 72 h    | A 50% toxicity             | n.d.                                                                                        | [103] |
| <i>Desmodesmus quadricauda</i>         |               | 5.2 mg/L            |         |                            |                                                                                             |       |

|                                                                                                              |               |                                     |         |                                        |                                         |       |
|--------------------------------------------------------------------------------------------------------------|---------------|-------------------------------------|---------|----------------------------------------|-----------------------------------------|-------|
| <i>Microcystis aeruginosa</i>                                                                                |               | 0.02 mg/L                           |         |                                        |                                         |       |
| <i>Cylindrotheca closterium</i><br><i>Navicula ramosissima</i>                                               | Ciprofloxacin | 55 mg/L<br>72 mg/L                  | -       | A 50% inhibition                       | n.d.                                    | [109] |
| <i>Selenastrum capricornutum</i><br><i>Rhodomonas salina</i><br><i>Microcystis aeruginosa</i>                | Flumequine    | 5 mg/L<br>18 mg/L<br>0.159 mg/L     | -       | A 50% toxicity                         | -                                       | [68]  |
| <i>Selenastrum capricornutum</i><br><i>Rhodomonas salina</i><br><i>Microcystis aeruginosa</i>                | Oxolinic acid | 16 mg/L<br>10 mg/L<br>0.18 mg/L     | -       | A 50% toxicity                         | -                                       | [68]  |
| <i>Selenastrum capricornutum</i><br><i>Rhodomonas salina</i><br><i>Microcystis aeruginosa</i>                | Sarafloxacin  | 16 mg/L<br>24 mg/L<br>0.015 mg/L    | -       | A 50% toxicity                         | -                                       | [68]  |
| <i>Pseudokirchneriella subcapitata</i>                                                                       | Ofloxacin     | 5.3 mg/L                            | 72 h    | A 50% toxicity                         | n.d.                                    | [48]  |
| <i>Pseudokirchneriella subcapitata</i>                                                                       | Ofloxacin     | 1.44 mg/L                           | 72 h    | A 50% toxicity                         | n.d.                                    | [65]  |
| <i>Pseudokirchneriella subcapitata</i><br><i>Cyclotella meneghiniana</i><br><i>Synechococcus leopolensis</i> | Ofloxacin     | 4.7 mg/L<br>0.09 mg/L<br>0.016 mg/L | 96 h    | A 50% toxicity                         | n.d.                                    | [82]  |
| <i>Antibiotics-macrolides</i>                                                                                |               |                                     |         |                                        |                                         |       |
| <i>Chlorella vulgaris</i><br><i>Ankestrodesmus falcatius</i>                                                 | Erythromycin  | 12 mg/L<br>10 mg/L                  | 24 h    | A 50% toxicity                         | Decrease in SOD and CAT activity        | [112] |
| <i>Selenastrum capricornutum</i>                                                                             | Erythromycin  | 0.3 mg/L                            | 96 h    | A 90% inhibition                       | Decrease in Chl <i>a</i> , Chl <i>b</i> | [80]  |
| <i>Pseudokirchneriella subcapitata</i>                                                                       | Erythromycin  | 0.124 mg/L (170 nM)                 | 72 h    | A 50% inhibition                       | n.d.                                    | [110] |
| <i>Pseudokirchneriella subcapitata</i>                                                                       | Erythromycin  | 0.02 mg/L                           | 72 h    | A 50% toxicity                         | n.d.                                    | [65]  |
| <i>Pseudokirchneriella subcapitata</i><br><i>Anabaena</i>                                                    | Erythromycin  | 0.35 mg/L<br>0.022 mg/L             | 72 h    | A 50% toxicity                         | n.d.                                    | [55]  |
| <i>Chlamydomonas reinhardtii</i><br><i>Phaeodactylum tricorutum</i>                                          | Erythromycin  | 0.36 mg/L<br>1.31 mg/L              | 72 h    | A 50% inhibition                       | Whole cell                              | [111] |
| <i>Chaetoceros gracilis</i>                                                                                  | Erythromycin  | 1 mg/L<br>9 mg/L                    | 15 days | A ~50% inhibition<br>A 100% inhibition | n.d.                                    | [43]  |
| <i>Pseudanabaena planctonica</i> (wild type)                                                                 | Erythromycin  | 10 mg/L (10 µg/mL)                  | 3 days  | No growth detected                     | n.d.                                    | [114] |

|                                        |                |                                   |        |                                               |                                                               |       |
|----------------------------------------|----------------|-----------------------------------|--------|-----------------------------------------------|---------------------------------------------------------------|-------|
| <i>Microcystis flosaquae</i>           | Erythromycin   | 0.04 mg/L<br>(40 µg/L)            | 8 days | An 82% inhibition                             | Increase in MDA content.<br>Increase in SOD and CAT activity. | [113] |
| <i>Anabaena cylindrica</i>             |                | 0.035 mg/L                        |        |                                               |                                                               |       |
| <i>Anabaena flosaquae</i>              |                | 0.27 mg/L                         |        |                                               |                                                               |       |
| <i>Anabaena variabilis</i>             | Erythromycin   | 0.43 mg/L                         | 144 h  | A 50% inhibition                              | n.d.                                                          | [47]  |
| <i>Microcystis aeruginosa</i>          |                | 0.023 mg/L                        |        |                                               |                                                               |       |
| <i>Microcystis wesenbergii</i>         |                | 0.023 mg/L                        |        |                                               |                                                               |       |
| <i>Nostoc</i> sp.                      |                | 0.2 mg/L                          |        |                                               |                                                               |       |
| <i>Synechococcus leopoldensis</i>      |                | 0.16 mg/L                         |        |                                               |                                                               |       |
| <i>Synechococcus</i> sp.               |                | 0.23 mg/L                         |        |                                               |                                                               |       |
| <i>Pseudokirchneriella subcapitata</i> | Clarithromycin | 0.002 mg/L                        | 72 h   | A 50% toxicity                                | n.d.                                                          | [65]  |
| <i>Pseudokirchneriella subcapitata</i> | Clarithromycin | 0.046 mg/L                        | 72 h   | A 50% inhibition                              | n.d.                                                          | [81]  |
| <i>Pseudokirchneriella subcapitata</i> | Clarithromycin | 0.23 mg/L                         | 72 h   | A 50% inhibition                              | n.d.                                                          | [115] |
| <i>Pseudokirchneriella subcapitata</i> | Clarithromycin | 0.018 mg/L (24 nM)                | 72 h   | A 50% inhibition                              | n.d.                                                          | [110] |
| <i>Pseudokirchneriella subcapitata</i> | Clarithromycin | 0.0069 mg/L                       | 72 h   | A 50% inhibition                              | n.d.                                                          | [116] |
| <i>Desmodesmus subspicatus</i>         | Clarithromycin | 0.03 mg/L<br>(32-37 µg/L)         | 72 h   | A 50% inhibition                              | n.d.                                                          | [117] |
| <i>Anabaena flosaquae</i>              |                | 0.005-0.012 mg/L<br>(5.6-12 µg/L) |        |                                               |                                                               |       |
| <i>Selenastrum capricornutum</i>       | Spiramycin     | 2.3 mg/L                          | 3 days | A 50% inhibition                              | n.d.                                                          | [56]  |
| <i>Microcystis aeruginosa</i>          |                | 0.005 mg/L                        | 7 days |                                               |                                                               |       |
| <i>Microcystis aeruginosa</i>          | Spiramycin     | 0.0011 mg/L                       | 7 days | A 50% inhibition                              | n.d.                                                          | [118] |
| <i>Pseudokirchneriella subcapitata</i> | Roxithromycin  | 0.047 mg/L                        | 72 h   | A 50% inhibition                              | n.d.                                                          | [81]  |
| <i>Pseudokirchneriella subcapitata</i> |                | 0.73 mg/L                         |        |                                               |                                                               |       |
| <i>Scenedesmus quadricauda</i>         | Roxithromycin  | 0.129 mg/L                        | 96 h   | A 50% inhibition                              | Changes in compositions of lipids, proteins and DNA.          | [40]  |
| <i>Scenedesmus obliquus</i>            |                | 0.077 mg/L                        |        |                                               |                                                               |       |
| <i>Scenedesmus acuminatus</i>          |                | 2.87 mg/L                         |        |                                               |                                                               |       |
| <i>Pseudokirchneriella subcapitata</i> | Azithromycin   | 0.005 mg/L                        | 72 h   | A 50% toxicity                                | n.d.                                                          | [48]  |
| <i>Pseudokirchneriella subcapitata</i> | Tylosin        | 0.21 mg/L                         | 72 h   | A 50% inhibition                              | n.d.                                                          | [81]  |
| <i>Selenastrum capricornutum</i>       | Tylosin        | 1.38 mg/L                         | 3 days | A 50% inhibition                              | n.d.                                                          | [56]  |
| <i>Microcystis aeruginosa</i>          |                | 0.034 mg/L                        | 7 days |                                               |                                                               |       |
| <i>Pseudokirchneriella subcapitata</i> | Tylosin        | 0.0089 mg/L                       | 24 h   | A 50% inhibition in photosynthetic efficiency | n.d.                                                          | [66]  |
| <i>Microcystis aeruginosa</i>          |                | 0.29 mg/L                         |        |                                               |                                                               |       |

|                                        |             |                           |        |                                  |      |       |
|----------------------------------------|-------------|---------------------------|--------|----------------------------------|------|-------|
| <i>Pseudokirchmeriella subcapitata</i> |             | 4.41 mg/L (4.14 μmol/L)   |        |                                  |      |       |
| <i>Desmodesmus subspicatus</i>         |             | 13 mg/L (12.19 μmol/L)    |        |                                  |      |       |
| <i>Navicula pelliculosa</i>            | Tylosin     | 1.42 mg/L (1.33 μmol/L)   | 4 days | A 50% inhibition                 | n.d. | [91]  |
| <i>Phaeodactylum tricornutum</i>       |             | 6.07 mg/L (5.7 μmol/L)    |        |                                  |      |       |
| <i>Anabaena flosaquae</i>              |             | 0.098 mg/L (0.092 μmol/L) |        |                                  |      |       |
| <i>Synechococcus leopoliensis</i>      |             | 0.096 mg/L (0.09 μmol/L)  |        |                                  |      |       |
| <i>Cylindrotheca closterium</i>        | Tylosin     | 0.27 mg/L                 | -      | A 50% inhibition                 | n.d. | [109] |
| <i>Navicula ramosissima</i>            |             | 0.99 mg/L                 |        |                                  |      |       |
| <i>Euglena gracilis</i>                |             | 30 mg/L (30 μg/mL)        |        |                                  |      |       |
| <i>Chlorella vulgaris</i>              |             | 3 mg/L (3 μg/mL)          |        |                                  |      |       |
| <i>Scenedesmus obliquus</i>            |             | 1 mg/L (1 μg/mL)          | 72 h   | Minimal inhibitory concentration |      | [119] |
| <i>Chlamydomonas reinhardtii</i>       | Nystatin    | 1 mg/L (1 μg/mL)          |        |                                  |      |       |
| <i>Ochromonas malhamensis</i>          |             | 1 mg/L (1 μg/mL)          |        |                                  |      |       |
| <i>Plectonema boryanum</i>             |             | 1 mg/L (1 μg/mL)          |        |                                  |      |       |
| <i>Navicula pelliculosa</i>            |             | >60 mg/L (>60 μg/mL)      |        |                                  |      |       |
| <i>Antibiotics-glycopeptides</i>       |             |                           |        |                                  |      |       |
| <i>Pseudokirchmeriella subcapitata</i> | Vancomycin  | 724 mg/L                  | 72 h   | A 50% inhibition                 | n.d. | [75]  |
| <i>Pseudokirchmeriella subcapitata</i> | Vancomycin  | 371 mg/L                  | 72 h   | A 50% toxicity                   | n.d. | [58]  |
| <i>Antibiotics-lincosamides</i>        |             |                           |        |                                  |      |       |
| <i>Cylindrotheca closterium</i>        | Lincomycin  | 14 mg/L                   | -      | A 50% inhibition                 | n.d. | [109] |
| <i>Navicula ramosissima</i>            |             | 11 mg/L                   |        |                                  |      |       |
| <i>Cyclotella meneghiniana</i>         |             | 1.6 mg/L                  |        |                                  |      |       |
| <i>Pseudokirchmeriella subcapitata</i> | Lincomycin  | 1.5 mg/L                  | 96 h   | A 50% toxicity                   | n.d. | [120] |
| <i>Synechococcus leopoliensis</i>      |             | 0.195 mg/L                |        |                                  |      |       |
| <i>Desmodesmus subspicatus</i>         |             | 7.08 mg/L (16 μmol/L)     |        |                                  |      |       |
| <i>Pseudokirchmeriella subcapitata</i> | Lincomycin  | 3.26 mg/L (7.36 μmol/L)   | 4 days | A 50% inhibition                 | n.d. | [91]  |
| <i>Anabaena flosaquae</i>              |             | 0.057 mg/L (0.13 μmol/L)  |        |                                  |      |       |
| <i>Synechococcus leopoliensis</i>      |             | 0.042 mg/L (0.095 μmol/L) |        |                                  |      |       |
| <i>Pseudokirchmeriella subcapitata</i> | Lincomycin  | 0.07 mg/L                 | 72 h   | A 50% toxicity                   | n.d. | [65]  |
| <i>Pseudokirchmeriella subcapitata</i> | Clindamycin | 0.01mg/L                  | 72 h   | A 50% inhibition                 | n.d. | [115] |
| <i>Antibiotics-nitrofurans</i>         |             |                           |        |                                  |      |       |

|                                                                   |                |                                  |            |                                                |                                                                                                     |       |
|-------------------------------------------------------------------|----------------|----------------------------------|------------|------------------------------------------------|-----------------------------------------------------------------------------------------------------|-------|
| <i>Desmodesmus subspicatus</i>                                    | Nitrofurantoin | 12-17 mg/L                       | 24-72 h    | A 50% inhibition                               | n.d.                                                                                                | [121] |
| <i>Desmodesmus subspicatus</i>                                    | Nitrofurantoin | 0.5 mg/L (500 µg/L)              | -          | A 70% inhibition in photosynthetic activity    | n.d.                                                                                                | [83]  |
| <i>Isochrysis galbana</i><br><i>Chaetoceros gracilis</i>          | Furazolidone   | 0.5 mg/L                         | 15 days    | Complete growth inhibition                     | n.d.                                                                                                | [43]  |
| <i>Chlorella pyrenoidosa</i>                                      | Furazolidone   | 1.3 mg/L                         | 2 days     | A 50% inhibition                               | n.d.                                                                                                | [122] |
| <i>Antibiotics-nitroimidazoles</i>                                |                |                                  |            |                                                |                                                                                                     |       |
| <i>Desmodesmus subspicatus</i>                                    | Metronidazole  | 0.0078-0.125 mg/L (7.8-125 µg/L) | -          | A 50%±4% inhibition of photosynthetic activity | n.d.                                                                                                | [83]  |
| <i>Scenedesmus vacuolatus</i>                                     | Metronidazole  | 705 mg/L                         | 24 h       | A 50% inhibition                               | n.d.                                                                                                | [50]  |
| <i>Chlorella</i> sp.                                              | Metronidazole  | 12.5 mg/L-38.8 mg/L              | 72 h       | A 50% toxicity                                 | n.d.                                                                                                | [123] |
| <i>Selenastrum capricornutum</i>                                  |                | 40.4 mg/L                        |            |                                                |                                                                                                     |       |
| <i>Pseudokirchmeriella subcapitata</i>                            | Metronidazole  | 56.6 mg/L                        | 72 h       | A 50% toxicity                                 | n.d.                                                                                                | [48]  |
| <i>Microcystis protocystis</i>                                    | Metronidazole  | 117 mg/L                         | 96 h       | A 50% inhibition                               | n.d.                                                                                                | [124] |
| <i>Antibiotics-quinoxalines</i>                                   |                |                                  |            |                                                |                                                                                                     |       |
| <i>Selenastrum capricornutum</i><br><i>Microcystis aeruginosa</i> | Olaquinox      | 40 mg/L                          | 3 days     | A 50% inhibition                               | n.d.                                                                                                | [56]  |
| <i>Pseudokirchmeriella subcapitata</i>                            | Quinocetone    | 5 mg/L                           | 7 days     | A 50% toxicity                                 | n.d.                                                                                                | [48]  |
|                                                                   |                | 1.72 mg/L                        | 72 h       |                                                |                                                                                                     |       |
| <i>Antibiotics-ansamycins</i>                                     |                |                                  |            |                                                |                                                                                                     |       |
| <i>Pseudokirchmeriella subcapitata</i>                            | Rifampicin     | 171 mg/L                         | 72 h       | A 50% toxicity                                 | n.d.                                                                                                | [48]  |
| <i>Anacystis montana</i>                                          | Rifamycin B    | 9 mg/L (12 µM)                   | Up to 72 h | Complete growth inhibition                     | Inhibition of nucleoside incorporation into RNA, and aminoacid incorporation into protein fractions | [125] |
|                                                                   | Rifamycin S    | 4.17 mg/L (6 µM)                 |            |                                                |                                                                                                     |       |
|                                                                   | Rifampicin     | 9.87 mg/L (12 µM)                |            |                                                |                                                                                                     |       |
| <i>Chlorella pyrenoidosa</i>                                      | Rifamycin B    | 18 mg/L (24 µM)                  | Up to 72 h | No growth affected                             | Cell bleaching (at 12 µM)                                                                           | [125] |
|                                                                   | Rifamycin S    | 16.7 mg/L (24 µM)                |            |                                                |                                                                                                     |       |
|                                                                   | Rifampicin     | 19.75 mg/L (24 µM)               |            |                                                |                                                                                                     |       |
| <i>Antibiotics-pleuromutilin derivatives</i>                      |                |                                  |            |                                                |                                                                                                     |       |
| <i>Selenastrum capricornutum</i><br><i>Microcystis aeruginosa</i> | Tiamulin       | 0.165 mg/L                       | 3 days     | A 50% inhibition                               | n.d.                                                                                                | [56]  |
|                                                                   |                | 0.003 mg/L                       | 7 days     |                                                |                                                                                                     |       |
| <i>Non-steroidal anti-inflammatory drugs (NSAIDs)</i>             |                |                                  |            |                                                |                                                                                                     |       |
| <i>Chlorella vulgaris</i>                                         | Ibuprofen      | 71-89 mg/L                       | 96 h       | A 50% inhibition                               | n.d.                                                                                                | [104] |
| <i>Chlorella</i> sp.                                              | Ibuprofen      | ≥100 mg/L (≥0.1 g/L)             | 48 h       | 100% death cells                               | n.d.                                                                                                | [126] |

|                                        |            |                         |                |                                             |                                        |       |
|----------------------------------------|------------|-------------------------|----------------|---------------------------------------------|----------------------------------------|-------|
| <i>Desmodesmus subspicatus</i>         | Ibuprofen  | 340 mg/L<br>(0.34 g/L)  | n.d.           | A 50% inhibition                            | n.d.                                   | [127] |
| <i>Desmodesmus subspicatus</i>         | Ibuprofen  | 92 mg/L                 | -              | A 50% inhibition in photosynthetic activity | n.d.                                   | [84]  |
| <i>Pseudokirchmeriella subcapitata</i> | Ibuprofen  | 230 mg/L<br>(0.23 g/L)  | 3-4 days       | A 50% toxicity                              | n.d.                                   | [128] |
| <i>Acutodesmus obliquus</i>            |            | 288 mg/L<br>(0.288 g/L) |                |                                             |                                        |       |
| <i>Chlamydomonas reinhardtii</i>       | Ibuprofen  | 622 mg/L<br>(0.622 g/L) | 5 h            | A 50% toxicity                              | n.d.                                   | [129] |
| <i>Nannochloropsis limnetica</i>       |            | 965 mg/L<br>(0.965 g/L) |                |                                             |                                        |       |
| <i>Navicula sp.</i>                    | Ibuprofen  | ≥50 mg/L                | 2 days         | Complete growth suppression                 | Inhibition of photosynthesis           | [130] |
| <i>Chlorella vulgaris</i>              | Naproxen   | 40-42 mg/L              | 24 h           | A 50% toxicity                              | n.d.                                   | [112] |
| <i>Ankeistrodesmus falcatus</i>        |            |                         |                |                                             |                                        |       |
| <i>Desmodesmus subspicatus</i>         | Naproxen   | 620 mg/L<br>(0.62 g/L)  | n.d.           | A 50% inhibition                            | n.d.                                   | [127] |
| <i>Pseudokirchmeriella subcapitata</i> | Naproxen   | 44.4 mg/L               | 72 h           | A 50% inhibition                            | n.d.                                   | [115] |
| <i>Pseudokirchmeriella subcapitata</i> | Naproxen   | 32 mg/L                 | 96 h           | A 50% inhibition                            | n.d.                                   | [131] |
| <i>Scenedesmus quadricauda</i>         | Naproxen   | 100 mg/L                | 24 h           | A 100% inhibition                           | n.d. (24 h)                            | [132] |
| <i>Anabaena flosaquae</i>              | Naproxen   | 12.3 mg/L               | 72 h           | A 50% biomass inhibition                    | n.d.                                   | [133] |
| <i>Desmodesmus subspicatus</i>         | Diclofenac | 72 mg/L                 | -              | A 50% inhibition                            | n.d.                                   | [127] |
| <i>Desmodesmus subspicatus</i>         | Diclofenac | 60 mg/L                 | 72 h           | A 50% inhibition                            | n.d.                                   | [134] |
| <i>Desmodesmus subspicatus</i>         | Diclofenac | 147.85 mg/L             | -              | A 50% inhibition in photosynthetic activity | n.d.                                   | [84]  |
| <i>Haematococcus pluvialis</i>         | Diclofenac | 29-53 mg/L              | 96 h – 14 days | A 50% inhibition in vegetative cell number  | Change in pigment (Chl, Car) content   | [135] |
| <i>Chlamydomonas reinhardtii</i>       | Diclofenac | 134 mg/L                | 24 h           | A 50% inhibition                            | Change in pigment (Chl b, Car) content | [138] |
| <i>Pseudokirchmeriella subcapitata</i> | Diclofenac | 65 mg/L                 | 72 h           | A 50% inhibition                            | n.d.                                   | [136] |
| <i>Pseudokirchmeriella subcapitata</i> | Diclofenac | 10 mg/L                 | 96 h           | A 50% inhibition                            | n.d.                                   | [137] |
| <i>Pseudokirchmeriella subcapitata</i> | Diclofenac | 21 mg/L                 | 72 h           | A 50% inhibition                            | n.d.                                   | [115] |
| <i>Pseudokirchmeriella subcapitata</i> |            | 16.3 mg/L               |                |                                             |                                        |       |
| <i>Cyclotella meneghiniana</i>         | Diclofenac | 19.2 mg/L               | 96 h           | A 50% toxicity                              | n.d.                                   | [82]  |
| <i>Synechococcus leopoldensis</i>      |            | 14.5 mg/L               |                |                                             |                                        |       |
| <i>Chlorella pyrenoidosa</i>           | Diclofenac | 60 mg/L - 150 mg/L      | 8 days         | A ≥30% inhibition                           | The whole cell                         | [107] |



|                                           |                             |                                                                         |         |                  |                                  |       |
|-------------------------------------------|-----------------------------|-------------------------------------------------------------------------|---------|------------------|----------------------------------|-------|
| <i>Dunaliella tertiolecta</i>             | Diclofenac                  | 185 mg/L                                                                | 96 h    | A 50% toxicity   | n.d.                             | [139] |
| <i>Pseudokirchmeriella subcapitata</i>    | Ketoprofen                  | 49 mg/L                                                                 | 72 h    | A 50% inhibition | n.d.                             | [115] |
| <i>Pseudokirchmeriella subcapitata</i>    | Ketoprofen                  | 24.6 mg/L                                                               | 72 h    | A 50% inhibition | n.d.                             | [116] |
| <i>Pseudokirchmeriella subcapitata</i>    | Etodolac                    | 102 mg/L                                                                | 72 h    | A 50% inhibition | n.d.                             | [116] |
| <i>Desmodesmus subspicatus</i>            | Acetylsalicylic acid        | 106 mg/L                                                                | -       | A 50% inhibition | n.d.                             | [127] |
| <i>Pseudokirchmeriella subcapitata</i>    | Acetylsalicylic acid        | 241 mg/L                                                                | 48 h    | A 50% inhibition | n.d.                             | [140] |
| <i>Pseudokirchmeriella subcapitata</i>    | Salicylic acid              | 23.7 mg/L                                                               | 72 h    | A 50% inhibition | n.d.                             | [141] |
| <i>Phaeodactylum tricornerutum</i>        | Salicylic acid              | 255 mg/L                                                                | 72 h    | A 50% inhibition | n.d.                             | [90]  |
| <i>Fever and pain treatment medicines</i> |                             |                                                                         |         |                  |                                  |       |
| <i>Pseudokirchmeriella subcapitata</i>    |                             |                                                                         |         |                  | n.d.                             |       |
| <i>Scenedesmus dimorphus</i>              |                             |                                                                         |         |                  | n.d.                             |       |
| <i>Stichococcus bacillaris</i>            | Paracetamol (acetaminophen) | >240 mg/L                                                               | 96 h    | A 50% inhibition | n.d.                             | [142] |
| <i>Chlorella vulgaris</i>                 |                             |                                                                         |         |                  | Increased car: chl a ratio       |       |
| <i>Chlamydomonas reinhardtii</i>          |                             |                                                                         |         |                  | n.d.                             |       |
| <i>Chlorella vulgaris</i>                 | Acetaminophen               | 88 mg/L                                                                 | 72-96 h | A 50% inhibition | n.d.                             | [106] |
| <i>Scenedesmus subspicatus</i>            | Acetaminophen               | 134 mg/L                                                                | 72 h    | A 50% inhibition | n.d.                             | [143] |
| <i>Pseudokirchmeriella subcapitata</i>    | Acetaminophen               | 88.7 mg/L                                                               | 72 h    | No inhibition    | n.d.                             | [116] |
| <i>Phaeodactylum tricornerutum</i>        | Paracetamol                 | 266 mg/L                                                                | 72 h    | A 50% inhibition | n.d.                             | [90]  |
| <i>Antidepressants</i>                    |                             |                                                                         |         |                  |                                  |       |
| <i>Pseudokirchmeriella subcapitata</i>    | Fluoxetine                  | 0.024-0.039 mg/L<br>(24-39 µg/L)                                        | 120 h   | A 50% inhibition | n.d.                             | [145] |
| <i>Pseudokirchmeriella subcapitata</i>    | Fluoxetine                  | 0.09 mg/L<br>(90 µg/L)                                                  | 24 h    | A 50% toxicity   | n.d.                             | [146] |
| <i>Chlorella vulgaris</i>                 | Fluoxetine                  | 0.036-0.04 mg/L<br>(36-40 µg/L)                                         | 24 h    | A 50% toxicity   | Decrease in SOD and CAT activity | [112] |
| <i>Ankestrodesmus falcatus</i>            |                             | 5 mg/L                                                                  |         |                  |                                  |       |
| <i>Acutodesmus obliquus</i>               | Fluoxetine                  | 1.6 mg/L                                                                | 5 h     | A 50% toxicity   | n.d.                             | [129] |
| <i>Chlamydomonas reinhardtii</i>          |                             |                                                                         |         |                  |                                  |       |
| <i>Dunaliella tertiolecta</i>             | Fluoxetine                  | 0.169 mg/L<br>(169 µg/L)                                                | 96 h    | A 50% toxicity   | n.d.                             | [139] |
| <i>Skeletonema pseudocostatum</i>         | Fluoxetine                  | 0.018 mg/L<br>(18 µg/L)                                                 | 72 h    | A 50% inhibition | n.d.                             | [153] |
| <i>Scenedesmus vacuolatus</i>             | Fluoxetine                  | 0.024(pH=10)-<br>0.207(pH=6.5) mg/L<br>[24(pH=10)-<br>207(pH=6.5) µg/L] | 24 h    | A 50% toxicity   | n.d.                             | [152] |

|                                        |               |                            |      |                  |      |       |
|----------------------------------------|---------------|----------------------------|------|------------------|------|-------|
| <i>Chlorella pyrenoidosa</i>           |               | 0.64 mg/L                  |      |                  |      |       |
| <i>Chlorella ellipsoidea</i>           |               | 0.77 mg/L                  |      |                  |      |       |
| <i>Scenedesmus obliquus</i>            |               | 0.07 mg/L                  |      |                  |      |       |
| <i>Scenedesmus quadricauda</i>         | Fluoxetine    | 0.09 mg/L                  | 96 h | A 50% inhibition | n.d. | [151] |
| <i>Dunaliella salina</i>               |               | 0.09 mg/L                  |      |                  |      |       |
| <i>Dunaliella parva</i>                |               | 0.05 mg/L                  |      |                  |      |       |
| <i>Chlamydomonas microspiraera</i>     |               | 0.25 mg/L                  |      |                  |      |       |
| <i>Pseudokirchmeriella subcapitata</i> | Fluoxetine    | 0.2 mg/L                   |      |                  |      |       |
|                                        | Sertraline    | 0.15 mg/L                  |      |                  |      |       |
|                                        | Duloxetine    | 0.37 mg/L                  |      |                  |      |       |
|                                        | Clomipramine  | 0.46 mg/L                  |      |                  |      |       |
|                                        | Paroxetine    | 0.63 mg/L                  | 72 h | A 50% inhibition | n.d. | [115] |
|                                        | Amitriptyline | 0.72 mg/L                  |      |                  |      |       |
|                                        | Fluvoxamine   | 0.98 mg/L                  |      |                  |      |       |
|                                        | Mianserine    | 2.1 mg/L                   |      |                  |      |       |
|                                        | Citalopram    | 3.3 mg/L                   |      |                  |      |       |
| <i>Pseudokirchmeriella subcapitata</i> | Venlafaxine   | 47.5 mg/L                  |      |                  |      |       |
|                                        | Milnacipran   | 61.3 mg/L                  |      |                  |      |       |
|                                        | Fluoxetine    | 0.027 mg/L                 |      |                  |      |       |
|                                        | Sertraline    | 0.043 mg/L                 |      |                  |      |       |
|                                        | Fluvoxamine   | 0.062 mg/L                 | 48 h | A 50% toxicity   | n.d. | [149] |
| <i>Skeletonema marinoi</i>             | Paroxetine    | 0.14 mg/L                  |      |                  |      |       |
|                                        | Citalopram    | 1.6 mg/L                   |      |                  |      |       |
|                                        | Fluoxetine    | 0.048 mg/L<br>(48 µg/L)    |      |                  |      |       |
|                                        | Duloxetine    | 0.0019 mg/L<br>(1.9 µg/L)  |      |                  |      |       |
|                                        | Clomipramine  | 0.0033 mg/L<br>(3.3 µg/L)  |      |                  |      |       |
|                                        | Amitriptyline | 0.0438 mg/L<br>(43.8 µg/L) | 72 h | A 50% inhibition | n.d. | [148] |
|                                        | Sertraline    | 0.0618 mg/L<br>(61.8 µg/L) |      |                  |      |       |
|                                        | Fluvoxamine   | 0.114 mg/L<br>(114.5 µg/L) |      |                  |      |       |
|                                        | Paroxetine    | 0.121 mg/L<br>(121 µg/L)   |      |                  |      |       |
| <i>Pseudokirchmeriella subcapitata</i> | Citalopram    | 0.5 mg/L<br>(500 µg/L)     |      |                  |      |       |
|                                        | Venlafaxine   | 6.9 mg/L<br>(6900 µg/L)    |      |                  |      |       |
| <i>Scenedesmus acutus</i>              |               | 0.045 mg/L<br>(45 µg/L)    |      |                  |      |       |
| <i>Scenedesmus quadricauda</i>         | Fluoxetine    | 0.091 mg/L<br>(91 µg/L)    | 96 h | A 50% inhibition | n.d. | [150] |
| <i>Chlorella vulgaris</i>              |               | 0.213 mg/L<br>(213 µg/L)   |      |                  |      |       |
| <i>Chlorella vulgaris</i>              |               | 4.339 mg/L<br>(4339 µg/L)  |      |                  |      |       |
| <i>Pseudokirchmeriella subcapitata</i> |               | 4 mg/L<br>(4003 µg/L)      |      |                  |      |       |
| <i>Scenedesmus</i>                     |               | 3.62 mg/L                  |      |                  |      |       |

|                                        |                |                                                                  |        |                  |      |       |
|----------------------------------------|----------------|------------------------------------------------------------------|--------|------------------|------|-------|
| <i>Scenedesmus quadricauda</i>         | Fluvoxamine    | (3620 µg/L)                                                      | 96 h   | A 50% inhibition | n.d. | [150] |
| <i>Chlorella vulgaris</i>              |                | 10.208 mg/L (10208 µg/L)                                         |        |                  |      |       |
| <i>Pseudokirchneriella subcapitata</i> |                | 0.012 mg/L (12 µg/L)                                             |        |                  |      |       |
| <i>Scenedesmus acutus</i>              | Sertraline     | 0.099 mg/L (99 µg/L)                                             | 96 h   | A 50% inhibition | n.d. | [150] |
| <i>Scenedesmus quadricauda</i>         |                | 0.317 mg/L (317 µg/L)                                            |        |                  |      |       |
| <i>Chlorella vulgaris</i>              |                | 0.763 mg/L (763 µg/L)                                            |        |                  |      |       |
| <i>Scenedesmus vacuolatus</i>          | Trimipramine   | 0.738(pH=10)-21.730(pH=6.5) mg/L [738(pH=10)-21730(pH=6.5) µg/L] | 24 h   | A 50% toxicity   | n.d. | [152] |
| <i>Pseudokirchneriella subcapitata</i> | (±)Sulpiride   | 99.8 mg/L                                                        | 72 h   | A 50% inhibition | n.d. | [116] |
| <i>Pseudokirchneriella subcapitata</i> | Norfluoxetine  | 0.242 mg/L (242 µg/L)                                            | 24 h   | A 50% inhibition | n.d. | [146] |
| <i>Scenedesmus vacuolatus</i>          | Norfluoxetine  | 0.066(pH=10)-0.531(pH=6.5) mg/L [66(pH=10)-531(pH=6.5) µg/L]     | 24 h   | A 50% toxicity   | n.d. | [152] |
| <i>Chlorella vulgaris</i>              | Sertraline-HCl | 0.2 mg/L (200 µg/L)                                              | 7 days | A 57% inhibition | n.d. | [154] |
| <i>Microcystis aeruginosa</i>          |                | 0.2 mg/L (200 µg/L)                                              |        | A 69% inhibition |      |       |
| <i>Pseudokirchneriella subcapitata</i> | Sertraline-HCl | 0.14 mg/L                                                        | 72 h   | A 50% inhibition | n.d. | [155] |
| <i>Lipid regulators</i>                |                |                                                                  |        |                  |      |       |
| <i>Pseudokirchneriella subcapitata</i> | Gemfibrozil    | 15 mg/L                                                          | 72 h   | A 50% inhibition | n.d. | [156] |
| <i>Pseudokirchneriella subcapitata</i> | Gemfibrozil    | 29.7 mg/L                                                        | 72 h   | A 50% inhibition | n.d. | [136] |
| <i>Pseudokirchneriella subcapitata</i> | Gemfibrozil    | 49 mg/L                                                          | 72 h   | A 50% inhibition | n.d. | [157] |
| <i>Anabaena sp.</i>                    | Gemfibrozil    | 4-9 mg/L                                                         | 1-24 h | A 50% toxicity   | n.d. | [158] |
| <i>Pseudokirchneriella subcapitata</i> | Fenofibrate    | 19.8 mg/L                                                        | 72 h   | A 50% inhibition | n.d. | [156] |
| <i>Pseudokirchneriella subcapitata</i> | Bezafibrate    | 60 mg/L                                                          | 72 h   | No inhibition    | n.d. | [156] |
| <i>Pseudokirchneriella subcapitata</i> | Bezafibrate    | 100 mg/L                                                         | 72 h   | No inhibition    | n.d. | [116] |
| <i>Pseudokirchneriella subcapitata</i> | Bezafibrate    | 103 mg/L                                                         | 72 h   | A 50% inhibition | n.d. | [157] |
| <i>Anabaena sp.</i>                    | Bezafibrate    | 7-41 mg/L                                                        | 1-24 h | A 50% toxicity   | n.d. | [158] |
| <i>Dunaliella tertiolecta</i>          | Simvastatin    | 22.8 mg/L                                                        | 96 h   | A 50% toxicity   | n.d. | [139] |
| <i>Tetraselmis chunii</i>              | Clofibrate     | 39.7 mg/L                                                        | 96 h   | A 50% inhibition | n.d. | [159] |
| <i>Tetraselmis chunii</i>              | Clofibric acid | 318 mg/L                                                         | 96 h   | A 50% inhibition | n.d. | [159] |

|                                        |                          |                                                     |        |                      |                |       |
|----------------------------------------|--------------------------|-----------------------------------------------------|--------|----------------------|----------------|-------|
| <i>Scenedesmus subspicatus</i>         | Clofibrinic acid         | 89 mg/L                                             | 72 h   | A 50% inhibition     | n.d.           | [143] |
| <i>Desmodesmus subspicatus</i>         | Clofibrinic acid         | 115 mg/L                                            | 3 days | A 50% inhibition     | n.d.           | [160] |
| <i>Chlorella pyrenoidosa</i>           | Clofibrinic acid         | 100 mg/L - 150 mg/L                                 | 8 days | A ~50% inhibition    | The whole cell | [107] |
| <i>Pseudokirchmeriella subcapitata</i> | Clofibrinic acid         | 75 mg/L                                             | 96 h   | A 50% toxicity       | n.d.           | [137] |
| <i>Pseudokirchmeriella subcapitata</i> | Clofibrinic acid         | 94 mg/L                                             | 96 h   | A 50% toxicity       | n.d.           | [82]  |
| <i>Synechococcus leopoliensis</i>      |                          | 40.2 mg/L                                           |        |                      |                |       |
| <i>Anabaena sp.</i>                    | Clofibrinic acid         | 30-48 mg/L                                          | 1-24 h | A 50% toxicity       | n.d.           | [158] |
| <i>Dunaliella tertiolecta</i>          | Clofibrinic acid         | 1 mg/L                                              | 96 h   | No inhibitory effect | n.d.           | [161] |
| <i>Dunaliella tertiolecta</i>          | Clofibrinic acid         | 224 mg/L                                            | 96 h   | A 50% toxicity       | n.d.           | [139] |
| <i>Anti-neoplastic agents</i>          |                          |                                                     |        |                      |                |       |
| <i>Pseudokirchmeriella subcapitata</i> | 5-fluorouracil           | 0.13 mg/L                                           |        |                      |                |       |
|                                        | Cisplatin                | 1.52 mg/L                                           | 72 h   |                      | n.d.           | [162] |
|                                        | Etoposide                | 30.4 mg/L                                           |        | A 50% inhibition     |                |       |
|                                        | Imatinib mesylate        | 2.29 mg/L                                           |        |                      |                |       |
| <i>Raphidocelis subcapitata</i>        | 5-fluorouracil           | 0.075 mg/L                                          |        |                      |                |       |
|                                        | Tamoxifen                | >0.2 mg/L                                           |        |                      |                |       |
|                                        | Imatinib                 | 5 mg/L                                              | 72 h   | A 50% toxicity       | n.d.           | [163] |
|                                        | Methotrexate             | 9.5 mg/L                                            |        |                      |                |       |
|                                        | Cyclophosphamide         | >100 mg/L                                           |        |                      |                |       |
| <i>Pseudokirchmeriella subcapitata</i> |                          | 0.98 mg/L                                           |        |                      |                |       |
| <i>Chlorella vulgaris</i>              | Tamoxifen                | 0.61 mg/L                                           | 72 h   | A 50% inhibition     | n.d.           | [164] |
| <i>Chlamydomonas reinhardtii</i>       |                          | 0.47 mg/L                                           |        |                      |                |       |
| <i>Scenedesmus obliquus</i>            |                          | 30.5 mg/L                                           |        |                      |                |       |
| <i>Desmodesmus quadricauda</i>         | 5-fluorouracil           | 20.5 mg/L                                           | 72 h   | A 50% toxicity       | n.d.           | [103] |
| <i>Microcystis aeruginosa</i>          |                          | 6 mg/L                                              |        |                      |                |       |
| <i>Raphidocelis subcapitata</i>        |                          | 0.96 mg/L                                           |        |                      |                |       |
| <i>Desmodesmus subspicatus</i>         | 5-fluorouracil           | 45-53 mg/L                                          | 72 h   | A 50% toxicity       | n.d.           | [165] |
|                                        | Cytarabine               |                                                     |        |                      |                |       |
|                                        | Gemcitabine              |                                                     |        |                      |                |       |
| <i>Scenedesmus subspicatus</i>         | Methotrexate             | 260 mg/L                                            | 72 h   | A 50% inhibition     | n.d.           | [143] |
| <i>Skeletonema pseudocostatum</i>      | Thioguanine              | 0.014 mg/L (14.2 µg/L) [8.5*10 <sup>-8</sup> mol/L] | 72 h   | A 50% inhibition     | n.d.           | [153] |
| <i>Synechococcus leopoliensis</i>      | Cisplatin                | 0.67 mg/L                                           |        |                      |                |       |
|                                        | 5-fluorouracil           | 1.2 mg/L                                            | 72 h   | A 50% inhibition     | n.d.           | [162] |
|                                        | Imatinib mesylate        | 5.36 mg/L                                           |        |                      |                |       |
|                                        | Etoposide                | 351 mg/L                                            |        | No inhibition        |                |       |
| <i>Synechococcus leopoliensis</i>      | Cyclophosphamide         | 320 mg/L                                            |        | No toxicity          |                |       |
|                                        | Carboxy-cyclophosphamide | 17 mg/L                                             | 72 h   | A 50% toxicity       | n.d.           | [166] |
| <i>Anti-epileptic agents</i>           |                          |                                                     |        |                      |                |       |
| <i>Chlamydomonas mexicana</i>          |                          |                                                     |        | A 23% inhibition     |                |       |

|                                                                                                              |               |                                                           |                |                                                          |                                                                                        |       |
|--------------------------------------------------------------------------------------------------------------|---------------|-----------------------------------------------------------|----------------|----------------------------------------------------------|----------------------------------------------------------------------------------------|-------|
| <i>Chlamydomonas pitschmannii</i><br><i>Micractinium reisseri</i><br><i>Scenedesmus obliquus</i>             | Carbamazepine | 100 mg/L                                                  | 7 days         | A 31% inhibition<br>A 43% inhibition<br>A 60% inhibition | n.d.                                                                                   | [167] |
| <i>Desmodesmus subspicatus</i>                                                                               | Carbamazepine | 74 mg/L                                                   | 3 days         | A 50% inhibition                                         | n.d.                                                                                   | [160] |
| <i>Scenedesmus obliquus</i><br><i>Chlorella pyrenoidosa</i>                                                  | Carbamazepine | 54(144h)-<br>201(24h) mg/L<br>33(144h)-<br>1339(24h) mg/L | 24h to<br>144h | A 50% toxicity<br>A 50% toxicity                         | n.d.                                                                                   | [168] |
| <i>Chlorella vulgaris</i>                                                                                    | Carbamazepine | 37 mg/L                                                   | 48 h           | A 50% inhibition                                         | n.d.                                                                                   | [169] |
| <i>Dunaliella tertiolecta</i>                                                                                | Carbamazepine | 53(24h)-<br>296(96h) mg/L                                 | 24h to<br>96h  | A 50% inhibition                                         | Increase in MDA content<br>Increase in Car content<br>Decrease/Increase in Chl content | [170] |
| <i>Neochloris pseudoalveolaris</i>                                                                           | Carbamazepine | 0.1-1 mg/L                                                | -              | A ~29% inhibition                                        | Change in sugar content<br>Decrease in Chl a and Car                                   | [171] |
| <i>Phaeodactylum tricornutum</i>                                                                             | Carbamazepine | 62 mg/L                                                   | 72 h           | A 50% inhibition                                         | n.d.                                                                                   | [90]  |
| <i>Cyclotella meneghiniana</i><br><i>Synechococcus leopolensis</i>                                           | Carbamazepine | 31.6 mg/L<br>33.6 mg/L                                    | 96 h           | A 50% toxicity                                           | n.d.                                                                                   | [82]  |
| <i>Pseudokirchneriella subcapitata</i>                                                                       | Phenytoin     | 28.3 mg/L                                                 | 72 h           | A 50% inhibition                                         | n.d.                                                                                   | [116] |
| <i>Beta-blockers</i>                                                                                         |               |                                                           |                |                                                          |                                                                                        |       |
| <i>Pseudokirchneriella subcapitata</i>                                                                       | Propranolol   | 1.86 mg/L                                                 | 72 h           | A 50% inhibition                                         | n.d.                                                                                   | [115] |
| <i>Pseudokirchneriella subcapitata</i>                                                                       | Propranolol   | 0.77 mg/L                                                 | 72 h           | A 50% inhibition                                         | n.d.                                                                                   | [172] |
| <i>Pseudokirchneriella subcapitata</i><br><i>Cyclotella meneghiniana</i><br><i>Synechococcus leopolensis</i> | Propranolol   | 7.4 mg/L<br>0.24 mg/L<br>0.67 mg/L                        | 96 h           | A 50% toxicity                                           | n.d.                                                                                   | [82]  |
| <i>Scenedesmus vacuolatus</i>                                                                                | Propranolol   | 0.118(pH=10)<br>mg/L-<br>23.6(pH=6.5)<br>mg/L             | 24 h           | A 50% toxicity                                           | n.d.                                                                                   | [152] |
| <i>Scenedesmus vacuolatus</i>                                                                                | Propranolol   | 24 mg/L                                                   | 24 h           | A 50% toxicity                                           | n.d.                                                                                   | [173] |
| <i>Desmodesmus subspicatus</i>                                                                               | Propranolol   | 0.63 mg/L                                                 | -              | A 50% inhibition in photosynthetic activity              | n.d.                                                                                   | [84]  |
| <i>Desmodesmus subspicatus</i>                                                                               | Propranolol   | 5.8 mg/L                                                  | 3 days         | A 50% inhibition                                         | n.d.                                                                                   | [160] |
| <i>Acutodesmus obliquus</i><br><i>Chlamydomonas reinhardtii</i>                                              | Propranolol   | 19 mg/L<br>3 mg/L                                         | 5 h            | A 50% toxicity                                           | n.d.                                                                                   | [129] |
| <i>Chlorella vulgaris</i>                                                                                    | Propranolol   | 0.259 mg/L<br>2.59 mg/L<br>25.9 mg/L                      | 24 h           | F=21%<br>F=39%<br>F=54%                                  | Whole cell                                                                             | [174] |

|                                                                                                                                   |                  |                          |         |                                             |      |       |
|-----------------------------------------------------------------------------------------------------------------------------------|------------------|--------------------------|---------|---------------------------------------------|------|-------|
| <i>Skeletonema pseudocostatum</i>                                                                                                 | Propranolol      | 0.236 mg/L<br>(236 µg/L) | 72 h    | A 50% inhibition                            | n.d. | [153] |
| <i>Phaeodactylum tricornutum</i>                                                                                                  | Propranolol      | 0.29 mg/L                | 72 h    | A 50% inhibition                            | n.d. | [90]  |
| <i>Desmodesmus subspicatus</i>                                                                                                    | Metoprolol       | 7.3 mg/L                 | 3 days  | A 50% inhibition                            | n.d. | [160] |
| <i>Scenedesmus vacuolatus</i>                                                                                                     | Metoprolol       | 75 mg/L                  | 24 h    | A 50% toxicity                              | n.d. | [173] |
| <i>Pseudokirchmeriella subcapitata</i>                                                                                            | Metoprolol       | 74 mg/L                  | 72 h    | A 50% inhibition                            | n.d. | [115] |
| <i>Pseudokirchmeriella subcapitata</i>                                                                                            | Atenolol         | 143 mg/L – 190 mg/L      | 72 h    | A 50% toxicity                              | n.d. | [175] |
| <i>Phaeodactylum tricornutum</i>                                                                                                  | Atenolol         | 312 mg/L                 | 72 h    | A 50% inhibition                            | n.d. | [90]  |
| <i>Scenedesmus vacuolatus</i>                                                                                                     | Nadolol          | >100 mg/L                | 24 h    | A 50% toxicity                              | n.d. | [173] |
| <i>Estrogens</i>                                                                                                                  |                  |                          |         |                                             |      |       |
| <i>Raphidocelis subcapitata</i>                                                                                                   | Estradiol        | 3.2 mg/L                 | 96 h    | A 15% inhibition                            | n.d. | [182] |
| <i>Desmodesmus subspicatus</i>                                                                                                    | Ethinylestradiol | 12.35 mg/L               | -       | A 50% inhibition in photosynthetic activity | n.d. | [84]  |
| <i>Pseudokirchmeriella subcapitata</i>                                                                                            | Ethinylestradiol | 0.01 mg/L                | 24 h    | A 50% toxicity                              | n.d. | [176] |
|                                                                                                                                   |                  | 0.32 mg/L                | 48 h    |                                             |      |       |
|                                                                                                                                   |                  | 0.46 mg/L                | 72 h    |                                             |      |       |
|                                                                                                                                   |                  | 0.8 mg/L                 | 96 h    |                                             |      |       |
|                                                                                                                                   | Estradiol        | 0.01 mg/L                | 24 h    | A 50% toxicity                              | n.d. |       |
|                                                                                                                                   |                  | 0.05 mg/L                | 48 h    |                                             |      |       |
| <i>Desmodesmus subspicatus</i>                                                                                                    | Ethinylestradiol | 0.04 mg/L                | 24 h    | A 50% toxicity                              | n.d. | [176] |
|                                                                                                                                   |                  | 0.11 mg/L                | 48 h    |                                             |      |       |
|                                                                                                                                   |                  | 0.48 mg/L                | 72 h    |                                             |      |       |
|                                                                                                                                   | Estradiol        | 0.73 mg/L                | 96 h    | A 50% toxicity                              | n.d. |       |
|                                                                                                                                   |                  | 0.08 mg/L                | 24 h    |                                             |      |       |
|                                                                                                                                   |                  | 0.42 mg/L                | 48 h    |                                             |      |       |
| <i>Chlorella vulgaris</i>                                                                                                         | Ethinylestradiol | 0.66 mg/L                | 72 h    | A 50% inhibition                            | n.d. | [178] |
|                                                                                                                                   |                  | 1.07 mg/L                | 96 h    |                                             |      |       |
|                                                                                                                                   |                  | 122 mg/L                 | 7 days  |                                             |      |       |
|                                                                                                                                   | Estradiol        | 111 mg/L                 | 10 days | A 50% inhibition                            | n.d. |       |
|                                                                                                                                   |                  | 70 mg/L                  | 14 days |                                             |      |       |
|                                                                                                                                   |                  | 242 mg/L                 | 7 days  |                                             |      |       |
| <i>Scenedesmus armatus</i>                                                                                                        | Ethinylestradiol | 192 mg/L                 | 10 days | A 50% inhibition                            | n.d. | [178] |
|                                                                                                                                   |                  | 105 mg/L                 | 14 days |                                             |      |       |
|                                                                                                                                   |                  | 144 mg/L                 | 7 days  |                                             |      |       |
|                                                                                                                                   | Estradiol        | 118 mg/L                 | 10 days | A 50% inhibition                            | n.d. |       |
|                                                                                                                                   |                  | 74 mg/L                  | 14 days |                                             |      |       |
|                                                                                                                                   |                  | 522 mg/L                 | 7 days  |                                             |      |       |
| <i>Microcystis aeruginosa</i><br><i>Scenedesmus obliquus</i><br><i>Desmodesmus quadricauda</i><br><i>Raphidocelis subcapitata</i> | Ethinylestradiol | 368 mg/L                 | 10 days | A 50% toxicity                              | n.d. | [103] |
|                                                                                                                                   |                  | 207 mg/L                 | 14 days |                                             |      |       |
|                                                                                                                                   |                  | 1.48 mg/L                |         |                                             |      |       |
|                                                                                                                                   |                  | 0.82 mg/L                | 72 h    |                                             |      |       |
|                                                                                                                                   |                  | 0.29 mg/L                |         |                                             |      |       |
|                                                                                                                                   |                  | 0.21 mg/L                |         |                                             |      |       |

|                                        |                               |                                |         |                                             |                                                                                                                                                                                                                                                                   |       |
|----------------------------------------|-------------------------------|--------------------------------|---------|---------------------------------------------|-------------------------------------------------------------------------------------------------------------------------------------------------------------------------------------------------------------------------------------------------------------------|-------|
| <i>Anabaena variabilis</i>             | Ethinylestradiol              | 100 mg/L                       | 7 days  | A 50% toxicity                              | n.d.                                                                                                                                                                                                                                                              | [181] |
|                                        |                               | 71 mg/L                        | 10 days |                                             |                                                                                                                                                                                                                                                                   |       |
|                                        |                               | 83 mg/L                        | 14 days |                                             |                                                                                                                                                                                                                                                                   |       |
|                                        | Estradiol                     | 2002 mg/L                      | 7 days  |                                             |                                                                                                                                                                                                                                                                   |       |
|                                        |                               | 1281 mg/L                      | 10 days |                                             |                                                                                                                                                                                                                                                                   |       |
|                                        |                               | 438 mg/L                       | 14 days |                                             |                                                                                                                                                                                                                                                                   |       |
| <i>Desmodesmus communis</i>            | Ethinylestradiol              | 0.08-0.1 mg/L<br>(80-100 µg/L) | 72 h    | A 50% inhibition                            | n.d.                                                                                                                                                                                                                                                              | [177] |
| <i>Dunaliella salina</i>               | Ethinylestradiol              | 0.001 mg/L<br>(1 µg/L)         | 11 days | A 50% inhibition                            | Decrease in Chl a, Chl b and total Car content. Increase in SOD activity, decrease in CAT and GPx activity. Decrease in PUFA % content.                                                                                                                           | [179] |
| <i>Navicula incerta</i>                | Ethinylestradiol<br>Estradiol | 3.2 mg/L<br>>10 mg/L           | 96 h    | A 50% inhibition                            | Decrease in protein content and polysaccharide content, increase in lipid content (EE2 at 3 mg/L, E2 at 10 mg/L)<br>For EE2 at 3.5 mg/L: Increase in SOD and GST activity, decrease in POD activity.<br>For E2 at 10 mg/L: Increase in SOD, POD and GST activity. | [180] |
| <i>Anesthetic drugs</i>                |                               |                                |         |                                             |                                                                                                                                                                                                                                                                   |       |
| <i>Scenedesmus vacuolatus</i>          | Lidocaine                     | 12-1491 mg/L<br>(0.05-6.36 mM) | 24 h    | A 50% toxicity                              | n.d.                                                                                                                                                                                                                                                              | [152] |
| <i>Anti-anxiety agents</i>             |                               |                                |         |                                             |                                                                                                                                                                                                                                                                   |       |
| <i>Tetraselmis chunii</i>              | Diazepam                      | 16.5 mg/L                      | 96 h    | A 50% inhibition                            | n.d.                                                                                                                                                                                                                                                              | [159] |
| <i>Proton pump inhibitors</i>          |                               |                                |         |                                             |                                                                                                                                                                                                                                                                   |       |
| <i>Tetraselmis suecica</i>             | Omeprazole                    | 114 mg/L                       | 24 h    | A 50% inhibition                            | ROS generation                                                                                                                                                                                                                                                    | [183] |
| <i>Antiviral drugs</i>                 |                               |                                |         |                                             |                                                                                                                                                                                                                                                                   |       |
| <i>Desmodesmus subspicatus</i>         | Oseltamivir ethylester        | 6400 mg/L<br>(6.4 g/L)         | 24 h    | A 50% inhibition in photosynthetic activity | n.d.                                                                                                                                                                                                                                                              | [184] |
| <i>Pseudokirchmeriella subcapitata</i> | Oseltamivir ethylester        | 210 mg/L                       | 24 h    | A 50% inhibition                            | n.d.                                                                                                                                                                                                                                                              | [184] |
| <i>Pseudokirchmeriella subcapitata</i> | Oseltamivir ethylester        | 352 mg/L                       | 96 h    | A 50% inhibition                            | n.d.                                                                                                                                                                                                                                                              | [185] |
| <i>Antiparasitic drugs</i>             |                               |                                |         |                                             |                                                                                                                                                                                                                                                                   |       |
| <i>Scenedesmus vacuolatus</i>          | Flubendazole                  | >1 mg/L                        | 24 h    | Toxic/inhibitory effect                     | n.d.                                                                                                                                                                                                                                                              | [186] |
| <i>Scenedesmus subspicatus</i>         | Fenbendazole                  | 4.4 mg/L                       | 72 h    | A 50% toxicity                              | n.d.                                                                                                                                                                                                                                                              | [187] |
| <i>Antiallergic agents</i>             |                               |                                |         |                                             |                                                                                                                                                                                                                                                                   |       |
| <i>Pseudokirchmeriella subcapitata</i> | Diphenhydramine               | 1.24 mg/L                      | 72 h    | A 50% inhibition                            | n.d.                                                                                                                                                                                                                                                              | [116] |
|                                        | Epinastine                    | 3.75 mg/L                      |         |                                             |                                                                                                                                                                                                                                                                   |       |
| <i>ACE inhibitors</i>                  |                               |                                |         |                                             |                                                                                                                                                                                                                                                                   |       |
| <i>Desmodesmus subspicatus</i>         | Captopril                     | 168 mg/L                       | 3 days  | A 50% inhibition                            | n.d.                                                                                                                                                                                                                                                              | [160] |
| <i>Antiarrhythmic agents</i>           |                               |                                |         |                                             |                                                                                                                                                                                                                                                                   |       |
| <i>Tetraselmis chunii</i>              | Procainamide                  | 104 mg/L                       | 96 h    | A 50% reduction                             | n.d.                                                                                                                                                                                                                                                              | [70]  |
| <i>Quinazolines</i>                    |                               |                                |         |                                             |                                                                                                                                                                                                                                                                   |       |

|                                                         |                                       |                                    |             |                                          |                                                                   |       |
|---------------------------------------------------------|---------------------------------------|------------------------------------|-------------|------------------------------------------|-------------------------------------------------------------------|-------|
| <i>Microcystis aeruginosa</i>                           | Chlorophenylmethoxyphenyl quinazoline | 1.93 mg/L                          | 96 h        | A 50% inhibition                         | n.d.                                                              | [189] |
| <i>Antiseptic/preservative/disinfectant ingredients</i> |                                       |                                    |             |                                          |                                                                   |       |
| <i>Pseudokirchmeriella subcapitata</i>                  | Triclosan                             | 0.0005 mg/L<br>(0.53 µg/L)         | 72 h        | A 50% toxicity                           | n.d.                                                              | [190] |
| <i>Pseudokirchmeriella subcapitata</i>                  | Triclosan                             | 0.0005 mg/L<br>0.53 µg/L           | 72 h        | A 50% inhibition                         | n.d.                                                              | [81]  |
| <i>Pseudokirchmeriella subcapitata</i>                  | Triclosan                             | 0.025 mg/L<br>(25 µg/L)            | 72 h        | A 50% toxicity                           | n.d.                                                              | [191] |
| <i>Pseudokirchmeriella subcapitata</i>                  | Triclosan                             | 0.037 mg/L<br>(37 µg/L)            | 72 h        | A 50% inhibition                         | n.d.                                                              | [157] |
| <i>Raphidocelis subcapitata</i>                         | Triclosan                             | 0.0078 mg/L<br>(7.8 µg/L)          | 72 h        | A 50% inhibition                         | n.d.                                                              | [192] |
| <i>Selenastrum capricornutum</i>                        | Triclosan                             | 0.0047 mg/L<br>(4.7 µg/L)          | 72 h        | A 50% inhibition                         | n.d.                                                              | [193] |
| <i>Chlorella sp.</i>                                    | Triclosan                             | 1 mg/L                             | 72 h        | A 50% inhibition                         | n.d.                                                              | [200] |
| <i>Chlorella pyrenoidosa</i>                            |                                       |                                    |             |                                          |                                                                   |       |
| <i>Chlorella ellipsoidea</i>                            |                                       | 1 mg/L                             |             |                                          |                                                                   |       |
| <i>Scenedesmus obliquus</i>                             |                                       | 1.44 mg/L                          |             |                                          |                                                                   |       |
| <i>Scenedesmus quadricauda</i>                          | Triclosan                             | 0.2 mg/L                           | 96 h        | A 50% inhibition                         | n.d.                                                              | [151] |
| <i>Dunaliella salina</i>                                |                                       | 0.37 mg/L                          |             |                                          |                                                                   |       |
| <i>Dunaliella parva</i>                                 |                                       | 0.16 mg/L                          |             |                                          |                                                                   |       |
| <i>Chlamydomonas microspira</i>                         |                                       | 0.04 mg/L                          |             |                                          |                                                                   |       |
| <i>Chlamydomonas reinhardtii</i>                        | Triclosan                             | 1.35 mg/L                          |             |                                          |                                                                   |       |
| <i>Chlamydomonas reinhardtii</i>                        | Triclosan                             | 0.4 mg/L                           | 96 h        | A 36% inhibition                         | Whole cell/Increase in MDA content/Change in antioxidant activity | [194] |
| <i>Chlamydomonas reinhardtii</i>                        | Triclosan                             | 4 mg/L                             | 24 h        | A 50% toxicity                           | ROS generation                                                    | [195] |
| <i>Scenedesmus subspicatus</i>                          | Triclosan                             | 0.0014 mg/L<br>(1.4 µg/L)          | 96 h        | A 50% toxicity                           | n.d.                                                              | [197] |
| <i>Scenedesmus vacuolatus</i>                           | Triclosan                             | 0.0037 mg/L<br>(3.7 µg/L)          | 24 h        | A 50% inhibition in photosynthetic yield | n.d.                                                              | [198] |
| <i>Desmodesmus sp.</i>                                  | Triclosan                             | 0.4 mg/L                           | 4 days      | A 48% inhibition                         |                                                                   | [199] |
| <i>Chlorella pyrenoidosa</i>                            |                                       |                                    |             | A 65% inhibition                         | n.d.                                                              |       |
| <i>Scenedesmus obliquus</i>                             |                                       |                                    |             | No inhibition                            |                                                                   |       |
| <i>Dunaliella tertiolecta</i>                           | Triclosan                             | 0.0035 mg/L<br>(3.5 µg/L)          | 96 h        | A 50% toxicity                           | n.d.                                                              | [139] |
| <i>Tetraselmis suecica</i>                              | Triclosan                             | 0.8 mg/L                           | 24 h        | A 83% inhibition                         | Whole cell                                                        | [196] |
| <i>Skeletonema pseudocostatum</i>                       | Triclosan                             | 0.027 mg/L                         | 72 h        | A 50% inhibition                         | n.d.                                                              | [153] |
| <i>Navicula sp.</i>                                     | Triclosan                             | 0.145-0.173 mg/L<br>(145-173 µg/L) | 24 h – 72 h | A 50% toxicity                           | Decreased Ch <i>a</i> content                                     | [201] |
| <i>Microcystis aeruginosa</i>                           | Triclosan                             | 0.0092 mg/L<br>(9.2 µg/L)          | 96 h        | A 50% inhibition                         | Whole cell                                                        | [203] |



|                                        |                                                   |                                   |         |                  |                        |       |
|----------------------------------------|---------------------------------------------------|-----------------------------------|---------|------------------|------------------------|-------|
| <i>Anabaena flosaquae</i>              | Triclosan                                         | 0.0016 mg/L<br>(1.6 µg/L)         | 96 h    | A 50% toxicity   | n.d.                   | [197] |
| <i>Pseudokirchmeriella subcapitata</i> | Triclocarban                                      | 0.0057 mg/L<br>(5.7 µg/L)         | 72 h    | A 50% toxicity   | n.d.                   | [190] |
| <i>Pseudokirchmeriella subcapitata</i> | Triclocarban                                      | 0.017 mg/L<br>(17 µg/L)           | 72 h    | A 50% inhibition | n.d.                   | [81]  |
| <i>Skeletonema pseudocostatum</i>      | Cetrimonium bromide                               | 1.64 mg/L                         | 72 h    | A 50% inhibition | n.d.                   | [153] |
| <i>Scenedesmus obliquus</i>            | Climbazole                                        | 2 mg/L                            | 12 days | A 50% inhibition | n.d.                   | [204] |
| <i>Pseudokirchmeriella subcapitata</i> | Benzylparaben<br>i-butylparaben<br>n-butylparaben | 1.2 mg/L<br>4 mg/L<br>9.5 mg/L    | 96 h    | A 50% inhibition | n.d.                   | [205] |
| <i>Pseudokirchmeriella subcapitata</i> | Propylparaben<br>Butylparaben<br>Ethylparaben     | 0.17 mg/L<br>0.1 mg/L<br>0.4 mg/L | 48 h    | A 50% inhibition | n.d.                   | [140] |
| <i>Pseudokirchmeriella subcapitata</i> | Methylparaben                                     | 35 mg/L                           | 72 h    | A 50% inhibition | n.d.                   | [191] |
| <i>Chlorella vulgaris</i>              | Trichloroisocyanuric acid                         | 0.313 mg/L                        | 96 h    | A 50% inhibition | Uplift of CAT activity | [105] |
| <i>Chlorella vulgaris</i>              | Trichloroisocyanuric acid                         | 0.12 mg/L                         | 72 h    | A 50% inhibition | n.d.                   | [106] |

n.d.- no data available to the best of the authors' knowledge.
